# Supplementary material for: Peer review of the pesticide risk assessment of the active substance laminarin
Source: PubMed Central journal article supplement (PMC7010054; doi:10.2903/j.efsa.2017.4836), 2017-06-09
Supplement: EFS2-15-e04836-s001.pdf [file EFS2-15-e04836-s001.pdf]

Appendix to:

EFSA (European Food Safety Authority), 2017. Conclusion on the peer review of the pesticide risk assessment of the active substance laminarin. EFSA Journal 2017;15(5):4836, 45 pp. doi:10.2903/j.efsa.2017.4836

© European Food Safety Authority, 2017

## Appendix A – List of end points for the active substance and the representative formulation

### Identity, Physical and Chemical Properties, Details of Uses, Further Information (Regulation (EU) N° 283/2013, Annex Part A, points 1.3 and 3.2)

|                                    |                                                  |
|------------------------------------|--------------------------------------------------|
| Active substance (ISO Common Name) | Laminarin (common name, not ISO)                 |
| Function ( <i>e.g.</i> fungicide)  | Elicitor of the self-defence mechanisms of crops |
| Rapporteur Member State            | Netherlands                                      |
| Co-rapporteur Member State         | France                                           |

### Identity (Regulation (EU) N° 283/2013, Annex Part A, point 1)

|                                                                                                                                           |                                                                                           |
|-------------------------------------------------------------------------------------------------------------------------------------------|-------------------------------------------------------------------------------------------|
| Chemical name (IUPAC)                                                                                                                     | (1→3)-β-D-glucan<br>(according to IUPAC-IUB Joint Commission on Biochemical Nomenclature) |
| Chemical name (CA)                                                                                                                        | Laminarin                                                                                 |
| CIPAC No                                                                                                                                  | 671                                                                                       |
| CAS No                                                                                                                                    | 9008-22-4                                                                                 |
| EC No (EINECS or ELINCS)                                                                                                                  | 232-712-4                                                                                 |
| FAO Specification (including year of publication)                                                                                         | Not available                                                                             |
| Minimum purity of the active substance as manufactured                                                                                    | 860 g/kg on dry matter (TC)<br>60 g/L (min. 50 g/L, max. 70 g/L) (TK)                     |
| Identity of relevant impurities (of toxicological, ecotoxicological and/or environmental concern) in the active substance as manufactured | As, I :open<br>open for heavy metals                                                      |
| Molecular formula                                                                                                                         | (C <sub>6</sub> H <sub>10</sub> O <sub>5</sub> ) <sub>n</sub> n = 20 to 30                |
| Molar mass                                                                                                                                | 3240 – 4860 g/mol                                                                         |

## Structural formula

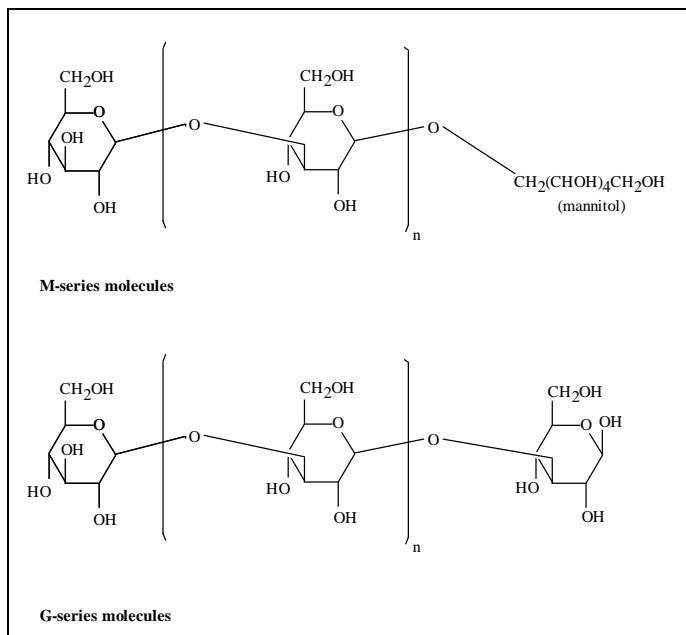

## Physical and chemical properties (Regulation (EU) N° 283/2013, Annex Part A, point 2)

|                                                                     |                                                                                                                                                                                                                                                                                                                                                                                                                                                                                                                         |    |           |         |                                |        |                                |                    |                                |          |                               |         |                               |              |                                |
|---------------------------------------------------------------------|-------------------------------------------------------------------------------------------------------------------------------------------------------------------------------------------------------------------------------------------------------------------------------------------------------------------------------------------------------------------------------------------------------------------------------------------------------------------------------------------------------------------------|----|-----------|---------|--------------------------------|--------|--------------------------------|--------------------|--------------------------------|----------|-------------------------------|---------|-------------------------------|--------------|--------------------------------|
| Melting point (state purity)                                        | Decomposes before melting                                                                                                                                                                                                                                                                                                                                                                                                                                                                                               |    |           |         |                                |        |                                |                    |                                |          |                               |         |                               |              |                                |
| Boiling point (state purity)                                        | Decomposes before boiling                                                                                                                                                                                                                                                                                                                                                                                                                                                                                               |    |           |         |                                |        |                                |                    |                                |          |                               |         |                               |              |                                |
| Temperature of decomposition (state purity)                         | >200 °C (98%)                                                                                                                                                                                                                                                                                                                                                                                                                                                                                                           |    |           |         |                                |        |                                |                    |                                |          |                               |         |                               |              |                                |
| Appearance (state purity)                                           | White to off-white crystals (98%)                                                                                                                                                                                                                                                                                                                                                                                                                                                                                       |    |           |         |                                |        |                                |                    |                                |          |                               |         |                               |              |                                |
| Vapour pressure (state temperature, state purity)                   | < 2.6x10 <sup>-5</sup> Pa at 25°C (98%)                                                                                                                                                                                                                                                                                                                                                                                                                                                                                 |    |           |         |                                |        |                                |                    |                                |          |                               |         |                               |              |                                |
| Henry's law constant (state temperature)                            | < 3.45x10 <sup>-7</sup> Pa m <sup>3</sup> mol <sup>-1</sup> (23-25°C)                                                                                                                                                                                                                                                                                                                                                                                                                                                   |    |           |         |                                |        |                                |                    |                                |          |                               |         |                               |              |                                |
| Solubility in water (state temperature, state purity and pH)        | 301.5 g/L at 23°C (98%)<br>No pH dependence expected                                                                                                                                                                                                                                                                                                                                                                                                                                                                    |    |           |         |                                |        |                                |                    |                                |          |                               |         |                               |              |                                |
| Solubility in organic solvents (state temperature, state purity)    | <table border="0"> <tr> <td>in</td> <td>g/L (98%)</td> </tr> <tr> <td>heptane</td> <td>&lt;10 mg/L, expressed as glucose</td> </tr> <tr> <td>xylene</td> <td>&lt;10 mg/L, expressed as glucose</td> </tr> <tr> <td>1,2-dichloroethane</td> <td>&lt;10 mg/L, expressed as glucose</td> </tr> <tr> <td>methanol</td> <td>60 mg/L, expressed as glucose</td> </tr> <tr> <td>acetone</td> <td>21 mg/L, expressed as glucose</td> </tr> <tr> <td>ethylacetate</td> <td>&lt;10 mg/L, expressed as glucose</td> </tr> </table> | in | g/L (98%) | heptane | <10 mg/L, expressed as glucose | xylene | <10 mg/L, expressed as glucose | 1,2-dichloroethane | <10 mg/L, expressed as glucose | methanol | 60 mg/L, expressed as glucose | acetone | 21 mg/L, expressed as glucose | ethylacetate | <10 mg/L, expressed as glucose |
| in                                                                  | g/L (98%)                                                                                                                                                                                                                                                                                                                                                                                                                                                                                                               |    |           |         |                                |        |                                |                    |                                |          |                               |         |                               |              |                                |
| heptane                                                             | <10 mg/L, expressed as glucose                                                                                                                                                                                                                                                                                                                                                                                                                                                                                          |    |           |         |                                |        |                                |                    |                                |          |                               |         |                               |              |                                |
| xylene                                                              | <10 mg/L, expressed as glucose                                                                                                                                                                                                                                                                                                                                                                                                                                                                                          |    |           |         |                                |        |                                |                    |                                |          |                               |         |                               |              |                                |
| 1,2-dichloroethane                                                  | <10 mg/L, expressed as glucose                                                                                                                                                                                                                                                                                                                                                                                                                                                                                          |    |           |         |                                |        |                                |                    |                                |          |                               |         |                               |              |                                |
| methanol                                                            | 60 mg/L, expressed as glucose                                                                                                                                                                                                                                                                                                                                                                                                                                                                                           |    |           |         |                                |        |                                |                    |                                |          |                               |         |                               |              |                                |
| acetone                                                             | 21 mg/L, expressed as glucose                                                                                                                                                                                                                                                                                                                                                                                                                                                                                           |    |           |         |                                |        |                                |                    |                                |          |                               |         |                               |              |                                |
| ethylacetate                                                        | <10 mg/L, expressed as glucose                                                                                                                                                                                                                                                                                                                                                                                                                                                                                          |    |           |         |                                |        |                                |                    |                                |          |                               |         |                               |              |                                |
| Surface tension (state concentration and temperature, state purity) | 72.2 mN/m at 20.2°C (1g/L) (98%)<br>Not a surface active material                                                                                                                                                                                                                                                                                                                                                                                                                                                       |    |           |         |                                |        |                                |                    |                                |          |                               |         |                               |              |                                |
| Partition coefficient (state temperature, pH and purity)            | log P <sub>OW</sub> = -1.6 (pH 4, 7 and 9) (98%)                                                                                                                                                                                                                                                                                                                                                                                                                                                                        |    |           |         |                                |        |                                |                    |                                |          |                               |         |                               |              |                                |
| Dissociation constant (state purity)                                | No dissociation within an environmentally relevant pH range.                                                                                                                                                                                                                                                                                                                                                                                                                                                            |    |           |         |                                |        |                                |                    |                                |          |                               |         |                               |              |                                |
| UV/VIS absorption (max.) incl. ε (state purity, pH)                 | At pH 1.9:<br>$\lambda_{\max} = 264 \text{ nm}; \epsilon = 245 \text{ to } 294 \text{ L}\cdot\text{mol}^{-1}\cdot\text{cm}^{-1}$<br>At pH 7.0:<br>$\lambda_{\max} = 260 \text{ nm}; \epsilon = 242 \text{ to } 290 \text{ L}\cdot\text{mol}^{-1}\cdot\text{cm}^{-1}$<br>At pH 11.8:<br>$\lambda_{\max} = 258 \text{ nm}; \epsilon = 264 \text{ to } 317 \text{ L}\cdot\text{mol}^{-1}\cdot\text{cm}^{-1}$                                                                                                               |    |           |         |                                |        |                                |                    |                                |          |                               |         |                               |              |                                |
| Flammability (state purity)                                         | Not flammable in the sense of Reg (EC) 1272/2008<br>Self-ignition >420°C<br>(both 90% pure)                                                                                                                                                                                                                                                                                                                                                                                                                             |    |           |         |                                |        |                                |                    |                                |          |                               |         |                               |              |                                |
| Explosive properties (state purity)                                 | Not explosive (theoretical consideration)                                                                                                                                                                                                                                                                                                                                                                                                                                                                               |    |           |         |                                |        |                                |                    |                                |          |                               |         |                               |              |                                |
| Oxidising properties (state purity)                                 | Not oxidising (theoretical consideration)                                                                                                                                                                                                                                                                                                                                                                                                                                                                               |    |           |         |                                |        |                                |                    |                                |          |                               |         |                               |              |                                |

**Summary of representative uses evaluated, for which all risk assessments needed to be completed (*name of active substance or the respective variant*)**  
**(Regulation (EU) N° 284/2013, Annex Part A, points 3, 4)**

| Crop and/or situation (a) | Member State or Country | Product name                 | F G or I (b) | Pests or Group of pests controlled (additionally: developmental stages of the pest or pest group) (c)                         | Preparation |                | Application         |                                     |                    | Interval between application (min) | Application rate per treatment               |                      |                                                         | PHI (days) (m) | Remarks:                                                                                                                        |
|---------------------------|-------------------------|------------------------------|--------------|-------------------------------------------------------------------------------------------------------------------------------|-------------|----------------|---------------------|-------------------------------------|--------------------|------------------------------------|----------------------------------------------|----------------------|---------------------------------------------------------|----------------|---------------------------------------------------------------------------------------------------------------------------------|
|                           |                         |                              |              |                                                                                                                               | Type (d-f)  | Conc. a.s. (i) | Method / Kind (f-h) | range of growth stages & season (j) | number min-max (k) |                                    | kg, L product / ha                           | Water L/ha min / max | g, kg as/ha (l)                                         |                |                                                                                                                                 |
| Apple (MABSD)             | EU                      | Vacciplant Fruits et Légumes | F            | Gloeosporium GLOESP<br><br>Powdery mildew <i>Podosphaera leucotricha</i> PODOLE<br><br>Scab <i>Venturia inaequalis</i> VENTIN | SL          | 45 g/L         | Foliar spraying     | BBCH 11-89 March to November        | 20                 | 7 days                             | Standard orchard: 1 L/ha<br><br>0.67 L/ha    | 200 - 500            | Standard orchard: 45 g a.s./ha<br><br>30.2 g as/ha      | 0              | a) Per season: 20<br><br>b) 20 L/ha<br><br>c) Standard orchard in this case is 3 m tall, with a row distance of 4 m.            |
| Apple (MABSD)             | EU                      | Vacciplant Fruits et Légumes | F            | Fire blight <i>Erwinia amylovora</i> EWIAM                                                                                    | SL          | 45 g/L         | Foliar spraying     | BBCH 56-89 April to November        | 7                  | 10 days                            | Standard orchard : 0.75 L/ha<br><br>0.5 L/ha | 500-1000             | Standard orchard : 33.8 g a.s./ha<br><br>22.5 g a.s./ha | 0              | a) Per season: 7<br><br>b) 5.25L/ha<br>3.5L/ha<br><br>c) Standard orchard in this case is 3 m tall, with a row distance of 4 m. |
| Pear (PYUCO)              | EU                      | Vacciplant Fruits et Légumes | F            | Fire blight <i>Erwinia amylovora</i> EWIAM                                                                                    | SL          | 45 g/L         | Foliar spraying     | BBCH 56-89 April to November        | 7                  | 10 days                            | Standard orchard : 0.75 L/ha<br><br>0.5 L/ha | 500-1000             | Standard orchard : 33.8 g a.s./ha<br><br>22.5 g a.s./ha | 0              | a) Per season: 7<br><br>b) 5.25L/ha<br>3.5L/ha<br><br>c) Standard orchard in this case is 3 m tall, with a row distance of 4 m. |

| Crop and/or situation (a) | Member State or Country | Product name                 | F G or I (b) | Pests or Group of pests controlled (additionally: developmental stages of the pest or pest group) (c)                                                                                                          | Preparation |                | Application         |                                     |                         | Interval between application (min) | Application rate per treatment |                      |                                      | PHI (days) (m) | Remarks:                                                                                                                                                                                          |
|---------------------------|-------------------------|------------------------------|--------------|----------------------------------------------------------------------------------------------------------------------------------------------------------------------------------------------------------------|-------------|----------------|---------------------|-------------------------------------|-------------------------|------------------------------------|--------------------------------|----------------------|--------------------------------------|----------------|---------------------------------------------------------------------------------------------------------------------------------------------------------------------------------------------------|
|                           |                         |                              |              |                                                                                                                                                                                                                | Type (d-f)  | Conc. a.s. (i) | Method / Kind (f-h) | range of growth stages & season (j) | number min-max (k)      |                                    | kg, L product / ha             | Water L/ha min / max | g, kg as/ha (l)                      |                |                                                                                                                                                                                                   |
| Vine (VITVI)              | EU                      | Vacciplant Fruits et Légumes | F            | Powdery mildew <i>Erysiphe necator</i> UNCINE                                                                                                                                                                  | SL          | 45 g/L         | Foliar spraying     | BBCH 11-89 April to october         | 10                      | 10 days                            | 2 L/ha                         | 100-1000             | a) 90 g a.s./ha                      | 0              | a) max. no. of applications per crop and season<br>b) Max product rate per season<br>c) Additional remarks                                                                                        |
| Lettuce (LACSA)           | EU                      | Vacciplant Fruits et Légumes | F, G*        | Downy mildew <i>Bremia lactucae</i> BREMLA                                                                                                                                                                     | SL          | 45 g/L         | Foliar spraying     | BBCH 13-49 January to December      | per cycle: 6 season: 16 | 7 days<br>7 days                   | 2.5 L/ha                       | 500-1000             | 113 g a.s./ha                        | 0              | a) Per crop: 6<br>Per season: 16<br>b) Per cycle: 15L/ha<br>Per season: 40L/ha                                                                                                                    |
| Strawberry (FRASS)        | EU                      | Vacciplant Fruits et Légumes | F, G*        | Powdery mildew <i>Podosphaera aphanis</i> PODOAP                                                                                                                                                               | SL          | 45 g/L         | Foliar spraying     | BBCH 12-92 March to October         | 7                       | 7 days                             | Min : 0.75 l<br>Max : 1 L/ha   | 300-1000             | 45 g a.s./ha                         | 0              | a) Per crop : 7<br>Per season : 7<br>b) 7L/ha<br>c) Min 0.75 L/ha<br>Max 1L/ha                                                                                                                    |
| Strawberry (FRASS)        | EU                      | Vacciplant Fruits et Légumes | F, G*        | Grey mould <i>Botrytis cinerea</i> BOTRCI<br><br>Leaf spot <i>Mycosphaerella fragariae</i> MYCOFR<br><br>Leaf scorch <i>Diplocarpon earliana</i> DIPCEA<br><br>Leather rot <i>Phytophthora cactorum</i> PHYTCC | SL          | 45 g/L         | Foliar spraying     | BBCH 12-92 February to September    | 7                       | 5-7 days                           | Min 1 L/ha Max 2 L/ha          | 300-1000             | Min 45 g a.s./ha<br>Max 90 g a.s./ha | 0              | a) Per crop: 7<br>Per season: 7<br>b) Min: 7L/ha<br>Max: 14L/ha<br><br>c) Apply Vacciplant at 1 L/ha for water volume below 500 L/ha. Above 500 L/ha keep the product concentration at 0.2 L/hL . |
| Tomato (LYPES)            | EU                      | Vacciplant Fruits et Légumes | F, G*        | Bacterial speck <i>Pseudomonas syringae</i> pv tomato PSDMTM                                                                                                                                                   | SL          | 45 g/L         | Foliar spraying     | BBCH 10-89 April to October         | 7                       | 7 days                             | Min 1 L/ha Max 2 L/ha          | 500-1300             | Min 45 g a.s./ha<br>Max 90 g a.s./ha | 0              | a) Per crop: 7<br>Per season: 7<br>b) Min: 7L/ha<br>Max: 14L/ha                                                                                                                                   |
| Tomato                    | EU                      | Vacciplant                   | F,           | Grey mould                                                                                                                                                                                                     | SL          | 45 g/L         | Foliar              | BBCH 10-89                          | 7                       | 7 days                             | Min 1.5 L/ha                   | 500-1300             | Min 67.5 g                           | 0              | a) Per crop: 7                                                                                                                                                                                    |

| Crop and/or situation (a)                       | Member State or Country | Product name                 | F G or I (b) | Pests or Group of pests controlled (additionally: developmental stages of the pest or pest group) (c) | Preparation |                | Application         |                                     |                    | Interval between application (min) | Application rate per treatment |                      |                           | PHI (days) (m) | Remarks:                                                                                                   |
|-------------------------------------------------|-------------------------|------------------------------|--------------|-------------------------------------------------------------------------------------------------------|-------------|----------------|---------------------|-------------------------------------|--------------------|------------------------------------|--------------------------------|----------------------|---------------------------|----------------|------------------------------------------------------------------------------------------------------------|
|                                                 |                         |                              |              |                                                                                                       | Type (d-f)  | Conc. a.s. (i) | Method / Kind (f-h) | range of growth stages & season (j) | number min-max (k) |                                    | kg, L product / ha             | Water L/ha min / max | g, kg as/ha (l)           |                |                                                                                                            |
| (LYPES)                                         |                         | Fruits et Légumes            | G*           | <i>Botrytis cinerea</i><br>BOTRCI                                                                     |             |                | spraying            | January to December                 |                    |                                    | Max 3 L/ha                     |                      | a.s./ha Max 135 g a.s./ha | 0              | a) max. no. of applications per crop and season<br>b) Max product rate per season<br>c) Additional remarks |
| Tomato (LYPES)                                  | EU                      | Vacciplant Fruits et Légumes | F, G*        | Powdery mildew <i>Leveillula taurica</i><br>LEVETA                                                    | SL          | 45 g/L         | Foliar spraying     | BBCH 10-89<br>March to December     | 7                  | 7 days                             | 1 L/ha                         | 500-1300             | 45 g a.s./ha              | 0              | a) Per crop: 7<br>Per season: 7<br>b) 7 L/ha                                                               |
| Courgette (CUUPG)                               | EU                      | Vacciplant Fruits et Légumes | F, G*        | Powdery mildew <i>Leveillula taurica</i><br>LEVETA                                                    | SL          | 45 g/L         | Foliar spraying     | BBCH 10-89<br>January to December   | 6                  | 5 days                             | 0.75 L/ha                      | 100-500              | 33.8 g a.s./ha            | 0              | a) Per crop: 6<br>Per season: 6<br>b) 4.5L/ha                                                              |
| Pumpkins (CUUMA)                                | EU                      | Vacciplant Fruits et Légumes | F            | Powdery mildew <i>Leveillula taurica</i><br>LEVETA                                                    | SL          | 45 g/L         | Foliar spraying     | BBCH 10-89<br>January to December   | 6                  | 5 days                             | 0.75 L/ha                      | 100-500              | 33.8 g a.s./ha            | 0              | a) Per crop: 6<br>Per season: 6<br>b) 4.5L/ha                                                              |
| Aubergine (SOLME)<br>Pepper (CPSAN)             | EU                      | Vacciplant Fruits et Légumes | F, G*        | Grey mould <i>Botrytis cinerea</i><br>BOTRCI                                                          | SL          | 45 g/L         | Foliar spraying     | BBCH 60-89<br>February to October   | 7                  | 7 days                             | 3 L/ha                         | 500-1300             | 135 g a.s./ha             | 0              | a) Per crop : 7<br>Per season: 7<br>b) 21L/ha<br>c)                                                        |
| Lettuce (LACSA)                                 | EU                      | Vacciplant Fruits et Légumes | F            | Grey mould <i>Botrytis</i> sp.<br>BOTRSP                                                              | SL          | 45 g/L         | Foliar spraying     | BBCH 16-49<br>January to December   | 7                  | 7 days                             | 3 L/ha                         | 750-1000             | 135 g a.s./ha             | 0              | a) Per crop: 7<br>Per season: 7<br>b) 21L/ha                                                               |
| Greenbean (PHSVV)                               | EU                      | Vacciplant Fruits et Légumes | F            | Grey mould <i>Botrytis</i> spp.<br>BOTRSP                                                             | SL          | 45 g/L         | Foliar spraying     | BBCH 51-89<br>March to September    | 7                  | 7 days                             | 3 L/ha                         | 800-1300             | a) 135 g a.s./ha          | 0              | a) Per crop: 7<br>Per season: 7<br>b) 21L/ha                                                               |
| Cucurbits: Cucumber (CUMSA)<br>Zucchini (CUUPG) | EU                      | Vacciplant Fruits et Légumes | F, G*        | Grey mould <i>Botrytis</i> spp.<br>BOTRSP                                                             | SL          | 45 g/L         | Foliar spraying     | BBCH 60-89<br>January to December   | 7                  | 7 days                             | 3 L/ha                         | 800-1300             | 135 g a.s./ha             | 0              | a) Per crop: 7<br>Per season: 7<br>b) 21L/ha                                                               |
| Cucumber (CUMSA)                                | EU                      | Vacciplant Fruits et Légumes | F, G*        | Downy mildew <i>Pseudoperonospora cubensis</i><br>PSPECU                                              | SL          | 45 g/L         | Foliar spraying     | BBCH 51-89<br>January to December   | 7                  | 7 days                             | 3 L/ha                         | 800-1300             | 135 g a.s./ha             | 0              | a) Per crop: 7<br>Per season: 7<br>b) 21L/ha                                                               |
| Kiwi (ATICH)                                    | EU                      | Vacciplant Fruits et Légumes | F            | Bacterial canker <i>Pseudomonas syringae</i> pv. <i>Actinidiae</i>                                    | SL          | 45 g/L         | Foliar spraying     | BBCH 11-<br>March to November       | 7                  | 10 days                            | 2 L/ha                         | 700-1000             | 90 g a.s./ha              | 0              | a) Per season: 7<br>b) 14L/ha                                                                              |

| Crop and/or situation (a) | Member State or Country | Product name | F G or I (b) | Pests or Group of pests controlled (additionally: developmental stages of the pest or pest group) (c) | Preparation |                | Application         |                                     |                    | Interval between application (min) | Application rate per treatment |                      |                 | PHI (days) (m) | Remarks:                                                                                                   |
|---------------------------|-------------------------|--------------|--------------|-------------------------------------------------------------------------------------------------------|-------------|----------------|---------------------|-------------------------------------|--------------------|------------------------------------|--------------------------------|----------------------|-----------------|----------------|------------------------------------------------------------------------------------------------------------|
|                           |                         |              |              |                                                                                                       | Type (d-f)  | Conc. a.s. (i) | Method / Kind (f-h) | range of growth stages & season (j) | number min-max (k) |                                    | kg, L product / ha             | Water L/ha min / max | g, kg as/ha (l) |                |                                                                                                            |
|                           |                         |              |              | PSDMAK                                                                                                |             |                |                     |                                     |                    |                                    |                                |                      |                 |                | a) max. no. of applications per crop and season<br>b) Max product rate per season<br>c) Additional remarks |

\*Greenhouse uses include both permanent and semi-permanent/open structures.

- (a) For crops, the EU and Codex classifications (both) should be taken into account; where relevant, the use situation should be described (e.g. fumigation of a structure)
- (b) Outdoor or field use (F), greenhouse application (G) or indoor application (I)
- (c) e.g. biting and sucking insects, soil born insects, foliar fungi, weeds
- (d) e.g. wettable powder (WP), emulsifiable concentrate (EC), granule (GR)
- (e) CropLife International Technical Monograph no 2, 6th Edition. Revised May 2008. Catalogue of pesticide
- (f) All abbreviations used must be explained
- (g) Method, e.g. high volume spraying, low volume spraying, spreading, dusting, drench
- (h) Kind, e.g. overall, broadcast, aerial spraying, row, individual plant, between the plant- type of equipment used must be indicated
- (i) g/kg or g/L. Normally the rate should be given for the active substance (according to ISO) and not for the variant in order to compare the rate for same active substances used in different variants (e.g. fluoroxypyr). **In certain cases, where only one variant is synthesised, it is more appropriate to give the rate for the variant (e.g. benthialvalicarb-isopropyl).**
- (j) Growth stage range from first to last treatment (BBCH Monograph, Growth Stages of Plants, 1997, Blackwell, ISBN 3-8263-3152-4), including where relevant, information on season at time of application
- (k) Indicate the minimum and maximum number of applications possible under practical conditions of use
- (l) The values should be given in g or kg whatever gives the more manageable number (e.g. 200 kg/ha instead of 200 000 g/ha or 12.5 g/ha instead of 0.0125 kg/ha)
- (m) PHI - minimum pre-harvest interval

**Summary of additional intended uses for which MRL applications have been made, that in addition to the uses above, have also been considered in the consumer risk assessment (name of active substance or the respective variant) Regulation (EC) N° 1107/2009 Article 8.1(g)**

**Important note: efficacy, environmental risk and risk to humans by exposure other than via their diet have not been assessed for these uses**

| Crop and/or situation (a)                                                            | Member State or Country | Product name | F G or I (b) | Pests or Group of pests controlled (c) | Preparation |                | Application       |                                     |                    |                                    | Application rate per treatment |                    |                        | PHI (days) (m) | Remarks |
|--------------------------------------------------------------------------------------|-------------------------|--------------|--------------|----------------------------------------|-------------|----------------|-------------------|-------------------------------------|--------------------|------------------------------------|--------------------------------|--------------------|------------------------|----------------|---------|
|                                                                                      |                         |              |              |                                        | Type (d-f)  | Conc. a.s. (i) | method kind (f-h) | range of growth stages & season (j) | number min-max (k) | Interval between application (min) | kg a.s./hL min-max (l)         | Water L/ha min-max | kg a.s./ha min-max (l) |                |         |
| <b>MRL Application</b> (according to Article 8.1(g) of Regulation (EC) No 1107/2009) |                         |              |              |                                        |             |                |                   |                                     |                    |                                    |                                |                    |                        |                |         |
| <i>Not applicable, inclusion in Annex IV of Reg (EC) 396/2005</i>                    |                         |              |              |                                        |             |                |                   |                                     |                    |                                    |                                |                    |                        |                |         |

- (a) For crops, the EU and Codex classifications (both) should be taken into account; where relevant, the use situation should be described (e.g. fumigation of a structure)
- (b) Outdoor or field use (F), greenhouse application (G) or indoor application (I)
- (c) *e.g.* biting and sucking insects, soil born insects, foliar fungi, weeds
- (d) *e.g.* wettable powder (WP), emulsifiable concentrate (EC), granule (GR)
- (e) CropLife International Technical Monograph no 2, 6th Edition. Revised May 2008. Catalogue of pesticide
- (f) All abbreviations used must be explained
- (g) Method, *e.g.* high volume spraying, low volume spraying, spreading, dusting, drench
- (h) Kind, *e.g.* overall, broadcast, aerial spraying, row, individual plant, between the plant- type of equipment used must be indicated
- (i) g/kg or g/L. Normally the rate should be given for the active substance (according to ISO) and not for the variant in order to compare the rate for same active substances used in different variants (e.g. fluoroxyppyr). **In certain cases, where only one variant is synthesised, it is more appropriate to give the rate for the variant (e.g. benthiavalicarb-isopropyl).**
- (j) Growth stage range from first to last treatment (BBCH Monograph, Growth Stages of Plants, 1997, Blackwell, ISBN 3-8263-3152-4), including where relevant, information on season at time of application
- (k) Indicate the minimum and maximum number of applications possible under practical conditions of use
- (l) The values should be given in g or kg whatever gives the more manageable number (e.g. 200 kg/ha instead of 200 000 g/ha or 12.5 g/ha instead of 0.0125 kg/ha)
- (m) PHI - minimum pre-harvest interval



## Further information, Efficacy

### Effectiveness (Regulation (EU) N° 284/2013, Annex Part A, point 6.2)

It was already demonstrated in biological assessment dossiers submitted for Vacciplant Fruits et Légumes in Belgium (2008) that this product reached a level of control sufficient when applied as preventive treatment on fruits and vegetables crops against a wide range of various pathogens. For further information see also Volume 1 level 1: 1.5.4 Overview on authorisations in EU Member States (Netherlands, 2017). The representative uses of the GAP are supported.

### Adverse effects on field crops (Regulation (EU) N° 284/2013, Annex Part A, point 6.4)

The representative uses of the GAP are supported, no negative effects are known.

### Observations on other undesirable or unintended side-effects (Regulation (EU) N° 284/2013, Annex Part A, point 6.5)

No undesirable or unintended side-effects on adjacent or succeeding crops are known when the product is applied as indicated on the label. The representative uses of the GAP are supported.

### Groundwater metabolites: Screening for biological activity (SANCO/221/2000-rev.10-final Step 3 a Stage 1)

Soil metabolites triggering groundwater exposure assessment were not identified so the provision of screening data was not triggered.

## Methods of Analysis

### Analytical methods for the active substance (Regulation (EU) N° 283/2013, Annex Part A, point 4.1 and Regulation (EU) N° 284/2013, Annex Part A, point 5.2)

|                                                     |                                    |
|-----------------------------------------------------|------------------------------------|
| Technical a.s. (analytical technique)               | Open, awaiting batch analysis data |
| Impurities in technical a.s. (analytical technique) | Open, awaiting batch analysis data |
| Plant protection product (analytical technique)     | IC                                 |

### Analytical methods for residues (Regulation (EU) N° 283/2013, Annex Part A, point 4.2 & point 7.4.2)

#### Residue definitions for monitoring purposes

|                         |                                |
|-------------------------|--------------------------------|
| Food of plant origin    | Not required                   |
| Food of animal origin   | Not required                   |
| Soil                    | No residue definition proposed |
| Sediment                | No residue definition proposed |
| Water surface           | No residue definition proposed |
| drinking/ground         | Laminarin                      |
| Air                     | No residue definition proposed |
| Body fluids and tissues | No residue definition proposed |

## Monitoring/Enforcement methods

|                                                                                               |                                              |
|-----------------------------------------------------------------------------------------------|----------------------------------------------|
| Food/feed of plant origin (analytical technique and LOQ for methods for monitoring purposes)  | Not required                                 |
| Food/feed of animal origin (analytical technique and LOQ for methods for monitoring purposes) | Not required                                 |
| Soil (analytical technique and LOQ)                                                           | Not required, no residue definition proposed |
| Water (analytical technique and LOQ)                                                          | Open for groundwater                         |
| Air (analytical technique and LOQ)                                                            | Not required, no residue definition proposed |
| Body fluids and tissues (analytical technique and LOQ)                                        | Not required, no residue definition proposed |

## Classification and labelling with regard to physical and chemical data (Regulation (EU) N° 283/2013, Annex Part A, point 10)

|                                                                                                                                                                                                |                                       |
|------------------------------------------------------------------------------------------------------------------------------------------------------------------------------------------------|---------------------------------------|
| Substance                                                                                                                                                                                      | Laminarin                             |
| Harmonised classification according to Regulation (EC) No 1272/2008 and its Adaptations to Technical Process [Table 3.1 of Annex VI of Regulation (EC) No 1272/2008 as amended] <sup>1</sup> : | No current harmonised classification. |
| Peer review proposal <sup>2</sup> for harmonised classification according to Regulation (EC) No 1272/2008:                                                                                     | None                                  |

<sup>1</sup> Regulation (EC) No 1272/2008 of the European Parliament and of the Council of 16 December 2008 on classification, labelling and packaging of substances and mixtures, amending and repealing Directives 67/548/EEC and 1999/45/EC, and amending Regulation (EC) No 1907/2006. OJ L 353, 31.12.2008, 1-1355.

<sup>2</sup> It should be noted that harmonised classification and labelling is formally proposed and decided in accordance with Regulation (EC) No 1272/2008.

## Impact on Human and Animal Health

### Absorption, distribution, metabolism and excretion (toxicokinetics) (Regulation (EU) N° 283/2013, Annex Part A, point 5.1)

|                                                             |                                                                                           |
|-------------------------------------------------------------|-------------------------------------------------------------------------------------------|
| Rate and extent of oral absorption/systemic bioavailability | Very limited absorption (<0.5%)                                                           |
| Toxicokinetics                                              | No specific ADME study available. Not required.                                           |
| Distribution                                                | Limited to the gastrointestinal tract and the liver                                       |
| Potential for bioaccumulation                               | No evidence for accumulation                                                              |
| Rate and extent of excretion                                | Degradation products rapidly and extensively excreted (approx. 90%) via breath and flatus |
| Metabolism in animals                                       | Extensively metabolised into short chain fatty acids via colonic microbiota fermentation  |
| <i>In vitro</i> metabolism                                  | No data - not required                                                                    |
| Toxicologically relevant compounds (animals and plants)     | None: laminarin is a polysaccharide of glucose and mannitol                               |
| Toxicologically relevant compounds (environment)            | None: laminarin is a polysaccharide of glucose and mannitol                               |

### Acute toxicity (Regulation (EU) N° 283/2013, Annex Part A, point 5.2)

|                                 |                                                                                 |
|---------------------------------|---------------------------------------------------------------------------------|
| Rat LD <sub>50</sub> oral       | > 2000 mg/kg bw                                                                 |
| Rat LD <sub>50</sub> dermal     | > 5000 mg/kg bw                                                                 |
| Rat LC <sub>50</sub> inhalation | > 1.02 mg/L air /4h ( <i>head-nose only; maximum attainable concentration</i> ) |
| Skin irritation                 | Non-irritant                                                                    |
| Eye irritation                  | Non-irritant                                                                    |
| Skin sensitisation              | Non-sensitising ( <i>M&amp;K test</i> )                                         |
| Phototoxicity                   | No data - not required                                                          |

### Short-term toxicity (Regulation (EU) N° 283/2013, Annex Part A, point 5.3)

|                                |                                                                         |
|--------------------------------|-------------------------------------------------------------------------|
| Target organ / critical effect | Rat: no effects<br>Dog: no effects                                      |
| Relevant oral NOAEL            | 90-day, dog: 1000 mg/kg bw per day<br>90-day rat: 1000 mg/kg bw per day |
| Relevant dermal NOAEL          | No data - not required                                                  |
| Relevant inhalation NOAEL      | No data - not required                                                  |

### Genotoxicity (Regulation (EU) N° 283/2013, Annex Part A, point 5.4)

|                         |                                                                                                                                       |
|-------------------------|---------------------------------------------------------------------------------------------------------------------------------------|
| <i>In vitro</i> studies | Ames test: equivocal<br>Gene mutation in mouse lymphoma: negative<br>Chromosome aberration in CHO cells (public literature): negative |
| <i>In vivo</i> studies  | Micronucleus: negative                                                                                                                |
| Photomutagenicity       | not required                                                                                                                          |

Potential for genotoxicity

Laminarin is unlikely to be genotoxic

**Long-term toxicity and carcinogenicity (Regulation (EU) N°283/2013, Annex Part A, point 5.5)**

Long-term effects (target organ/critical effect)

No data - not required

Relevant long-term NOAEL

No data - not required

Carcinogenicity (target organ, tumour type)

No data - not required

Relevant NOAEL for carcinogenicity

No data - not required

**Reproductive toxicity (Regulation (EU) N° 283/2013, Annex Part A, point 5.6)**
**Reproduction toxicity**

Reproduction target / critical effect

No data - not required

Relevant parental NOAEL

No data - not required

Relevant reproductive NOAEL

No data - not required

Relevant offspring NOAEL

No data - not required

**Developmental toxicity**

Developmental target / critical effect

 Rat:  
 Maternal toxicity: no effects  
 Developmental toxicity: no effects  
 Rabbit:  
 Maternal toxicity: no effects  
 Developmental toxicity: no effects

Relevant maternal NOAEL

 Rat: 1000 mg/kg bw per day (highest dose tested)  
 Rabbit: 1000 mg/kg bw per day (highest dose tested)

Relevant developmental NOAEL

 Rat: 1000 mg/kg bw per day (highest dose tested)  
 Rabbit: 1000 mg/kg bw per day (highest dose tested)

**Neurotoxicity (Regulation (EU) N° 283/2013, Annex Part A, point 5.7)**

Acute neurotoxicity

No data - not required

Repeated neurotoxicity

No data - not required

Additional studies (e.g. delayed neurotoxicity, developmental neurotoxicity)

No data - not required

**Other toxicological studies (Regulation (EU) N° 283/2013, Annex Part A, point 5.8)**

Supplementary studies on the active substance

No data - not required

Endocrine disrupting properties

No data - not required

Studies performed on metabolites or impurities

No data - not required

**Medical data (Regulation (EU) N° 283/2013, Annex Part A, point 5.9)**

Due to the nature of the active substance no medical surveillance is carried out.

**Summary<sup>3</sup> (Regulation (EU) N°1107/2009, Annex II, point 3.1 and 3.6)**

|                                                  | Value<br>(mg/kg bw<br>(per day)) | Study | Uncertainty<br>factor |
|--------------------------------------------------|----------------------------------|-------|-----------------------|
| Acceptable Daily Intake (ADI)                    | Not required                     | -     | -                     |
| Acute Reference Dose (ARfD)                      | Not required                     | -     | -                     |
| Acceptable Operator Exposure Level (AOEL)        | Not required                     | -     | -                     |
| Acute Acceptable Operator Exposure Level (AAOEL) | Not required                     | -     | -                     |

**Dermal absorption (Regulation (EU) N° 284/2013, Annex Part A, point 7.3)**

|                            |                        |
|----------------------------|------------------------|
| Representative formulation | No data – not required |
|----------------------------|------------------------|

**Exposure scenarios (Regulation (EU) N° 284/2013, Annex Part A, point 7.2)**

|                          |                                                                                                                                        |
|--------------------------|----------------------------------------------------------------------------------------------------------------------------------------|
| Operators                | No exposure assessment was deemed necessary, as the substance does not present a toxicological concern and is a natural polysaccharide |
| Workers                  | No exposure assessment was deemed necessary, as the substance does not present a toxicological concern and is a natural polysaccharide |
| Bystanders and residents | No exposure assessment was deemed necessary, as the substance does not present a toxicological concern and is a natural polysaccharide |

**Classification with regard to toxicological data (Regulation (EU) N° 283/2013, Annex Part A, Section 10)**

|                                                                                                                                                                                                |                                       |
|------------------------------------------------------------------------------------------------------------------------------------------------------------------------------------------------|---------------------------------------|
| Substance :                                                                                                                                                                                    | laminarin                             |
| Harmonised classification according to Regulation (EC) No 1272/2008 and its Adaptations to Technical Process [Table 3.1 of Annex VI of Regulation (EC) No 1272/2008 as amended] <sup>4</sup> : | No current harmonised classification. |
| Peer review proposal <sup>5</sup> for harmonised classification according to Regulation (EC) No 1272/2008:                                                                                     | None                                  |

<sup>3</sup> If available include also reference values for metabolites

<sup>4</sup> Regulation (EC) No 1272/2008 of the European Parliament and of the Council of 16 December 2008 on classification, labelling and packaging of substances and mixtures, amending and repealing Directives 67/548/EEC and 1999/45/EC, and amending Regulation (EC) No 1907/2006. OJ L 353, 31.12.2008, 1-1355.

<sup>5</sup> It should be noted that harmonised classification and labelling is formally proposed and decided in accordance with Regulation (EC) No 1272/2008.

## Residues in or on treated products food and feed

### Metabolism in plants (Regulation (EU) N° 283/2013, Annex Part A, points 6.2.1, 6.5.1, 6.6.1 and 6.7.1)

|                                                                                                     |                                                               |                |                       |                   |
|-----------------------------------------------------------------------------------------------------|---------------------------------------------------------------|----------------|-----------------------|-------------------|
| <b>Primary crops</b><br>(Plant groups covered)<br><b>OECD Guideline 501</b>                         | <b>Crop groups</b>                                            | <b>Crop(s)</b> | <b>Application(s)</b> | <b>DAT (days)</b> |
|                                                                                                     | Fruit crops                                                   | -              | -                     | -                 |
|                                                                                                     | Root crops                                                    | -              | -                     | -                 |
|                                                                                                     | Leafy crops                                                   | -              | -                     | -                 |
|                                                                                                     | Cereals/grass crops                                           | -              | -                     | -                 |
|                                                                                                     | Pulses/Oilseeds                                               | -              | -                     | -                 |
|                                                                                                     | Miscellaneous                                                 | -              | -                     | -                 |
| No plant metabolism studies submitted, not required                                                 |                                                               |                |                       |                   |
| <b>Rotational crops</b><br>(metabolic pattern)<br><b>OECD Guideline 502</b>                         | <b>Crop groups</b>                                            | <b>Crop(s)</b> | <b>PBI (days)</b>     | <b>Comments</b>   |
|                                                                                                     | Root/tuber crops                                              | -              | -                     |                   |
|                                                                                                     | Leafy crops                                                   | -              | -                     |                   |
|                                                                                                     | Cereal (small grain)                                          | -              | -                     |                   |
|                                                                                                     | Other                                                         | -              | -                     |                   |
| Rotational crop and primary crop metabolism similar?                                                | No rotational crop metabolism studies submitted, not required |                |                       |                   |
| <b>Processed commodities</b><br>(standard hydrolysis study)<br><b>OECD Guideline 507</b>            | <b>Conditions</b>                                             |                |                       |                   |
|                                                                                                     | 20 min, 90°C, pH 4                                            | -              | -                     | -                 |
|                                                                                                     | 60 min, 100°C, pH 5                                           | -              | -                     | -                 |
|                                                                                                     | 20 min, 120°C, pH 6                                           | -              | -                     | -                 |
| Residue pattern in processed commodities similar to residue pattern in raw commodities?             | Standard hydrolysis studies were not conducted, not required. |                |                       |                   |
| Plant residue definition for monitoring (RD-Mo)<br><b>OECD Guidance, series on pesticides No 31</b> | Not required                                                  |                |                       |                   |
| Plant residue definition for risk assessment (RD-RA)                                                | Not required                                                  |                |                       |                   |
| Conversion factor (monitoring to risk assessment)                                                   | -                                                             |                |                       |                   |

### Metabolism in livestock (Regulation (EU) N° 283/2013, Annex Part A, points 6.2.2, 6.2.3, 6.2.4, 6.2.5 6.7.1)

|                                                                                        |               |                          |                        |                       |
|----------------------------------------------------------------------------------------|---------------|--------------------------|------------------------|-----------------------|
| <b>OECD Guideline 503 and SANCO/11187/2013 rev. 3 (fish)</b><br><b>Animals covered</b> | <b>Animal</b> | <b>Dose (mg/kg bw/d)</b> | <b>Duration (days)</b> | <b>N rate/comment</b> |
|                                                                                        | Laying hen    | -                        | -                      | -                     |
|                                                                                        | Goat/Cow      | -                        | -                      | -                     |
|                                                                                        | Pig           | -                        | -                      | -                     |
|                                                                                        | Fish          | mg/kg DM                 | -                      | -                     |

|                                                                                                      | No livestock metabolism studies submitted, not required |
|------------------------------------------------------------------------------------------------------|---------------------------------------------------------|
| Time needed to reach a plateau concentration in milk and eggs (days)                                 | No study submitted, not required                        |
| Animal residue definition for monitoring (RD-Mo)<br><b>OECD Guidance, series on pesticides No 31</b> | not required                                            |
| Animal residue definition for risk assessment (RD-RA)                                                | not required                                            |
| Conversion factor (monitoring to risk assessment)                                                    | -                                                       |
| Metabolism in rat and ruminant similar (Yes/No)                                                      | -                                                       |
| Fat soluble residues (Yes/No)<br><b>(FAO, 2009)</b>                                                  | Not relevant                                            |

### Residues in succeeding crops (Regulation (EU) N° 283/2013, Annex Part A, point 6.6.2)

|                                                                                             |                                                             |
|---------------------------------------------------------------------------------------------|-------------------------------------------------------------|
| <b>Confined rotational crop study</b><br>(Quantitative aspect)<br><b>OECD Guideline 502</b> | No confined rotational crop studies submitted, not required |
| <b>Field rotational crop study</b><br><b>OECD Guideline 504</b>                             | No field rotational crop studies submitted, not required    |

**Stability of residues (Regulation (EU) N° 283/2013, Annex Part A, point 6.1)**  
**OECD Guideline 506**

| Plant products<br>(Category)                         | Commodity           | T<br>(°C) | Stability (Month/Year) |   |   |   |
|------------------------------------------------------|---------------------|-----------|------------------------|---|---|---|
|                                                      |                     |           |                        |   |   |   |
| High water content                                   | -                   | -         | -                      | - | - | - |
| High oil content                                     | -                   | -         | -                      | - | - | - |
| High protein<br>content                              | -                   | -         | -                      | - | - | - |
| High starch content                                  | -                   | -         | -                      | - | - | - |
| High acid content                                    | -                   | -         | -                      | - | - | - |
| No storage stability studies submitted, not required |                     |           |                        |   |   |   |
| Animal                                               | Animal<br>commodity | T<br>(°C) | Stability (Month/Year) |   |   |   |
|                                                      |                     |           |                        |   |   |   |
| -                                                    | Muscle              | -         | -                      | - | - | - |
| -                                                    | Liver               | -         | -                      | - | - | - |
| -                                                    | Kidney              | -         | -                      | - | - | - |
| -                                                    | Milk                | -         | -                      | - | - | - |
| -                                                    | Egg                 | -         | -                      | - | - | - |
| No storage stability studies submitted, not required |                     |           |                        |   |   |   |



**Summary of residues data from the supervised residue trials (Regulation (EU) N° 283/2013, Annex Part A, point 6.3) OECD Guideline 509, OECD Guidance, series on pesticides No 66 and OECD MRL calculator**

| Crop                                                 | Region/<br>Indoor<br>(a) | Residue levels (mg/kg) observed in the supervised residue trials relevant to the supported GAPs<br>(b) | Recommendations/comments<br>(OECD calculations) | MRL proposals<br>(mg/kg) | HR<br>(mg/kg)<br>(c) | STMR<br>(mg/kg)<br>(d) |
|------------------------------------------------------|--------------------------|--------------------------------------------------------------------------------------------------------|-------------------------------------------------|--------------------------|----------------------|------------------------|
| No supervised residue trials submitted, not required |                          |                                                                                                        |                                                 |                          |                      |                        |

- (a): **NEU** or **SEU** for northern or southern **outdoor** trials in EU member states (**N+SEU** if both zones), **Indoor** for glasshouse/protected crops, **Country** if non-EU location.
- (b): Residue levels in trials conducted according to GAP reported in ascending order (*e.g.* 3x <0.01, 0.01, 6x 0.02, 0.04, 0.08, 3x 0.10, 2x 0.15, 0.17). When residue definition for monitoring and risk assessment differs, use **Mo/RA** to differentiate data expressed according to the residue definition for **Monitoring** and **Risk Assessment**.
- (c): **HR**: Highest residue. When residue definition for monitoring and risk assessment differs, HR according to residue definition for monitoring reported in brackets (HR<sub>Mo</sub>).
- (d): **STMR**: Supervised Trials Median Residue. When residue definition for monitoring and risk assessment differs, STMR according to definition for monitoring reported in brackets (STMR<sub>Mo</sub>).

**Inputs for animal burden calculations**

| <b>Feed commodity</b> | <b>Median dietary burden</b> |                | <b>Maximum dietary burden</b> |                |
|-----------------------|------------------------------|----------------|-------------------------------|----------------|
|                       | (mg/kg)                      | <b>Comment</b> | (mg/kg)                       | <b>Comment</b> |
| Not relevant          | -                            | -              | -                             | -              |

**Residues from livestock feeding studies (Regulation (EU) N° 283/2013, Annex Part A, points 6.4.1, 6.4.2, 6.4.3 and 6.4.4)  
OECD Guideline 505 and OECD Guidance, series on pesticides No 73**

| MRL calculations                                                         | Ruminant                          |                     |                                   |                   | Pig/Swine                         |                        | Poultry                           |                       | Fish                              |                      |
|--------------------------------------------------------------------------|-----------------------------------|---------------------|-----------------------------------|-------------------|-----------------------------------|------------------------|-----------------------------------|-----------------------|-----------------------------------|----------------------|
|                                                                          | Beef cattle                       | -                   | Ram/Ewe                           | -                 | Breeding                          |                        | Broiler                           | -                     | Carp                              | -                    |
| Highest expected intake (mg/kg bw/d)                                     | Dairy cattle                      | -                   | Lamb                              | -                 | Finishing                         |                        | Layer                             | -                     | Trout                             | -                    |
| (mg/kg DM for fish)                                                      |                                   |                     |                                   |                   |                                   |                        | Turkey                            | -                     | Fish intake >0.1 mg/kg DM         |                      |
| Intake >0.004 mg/kg bw                                                   | Yes/No                            |                     | Yes/No                            |                   | Yes/No                            |                        | Yes/No                            |                       | Yes/No                            |                      |
| Feeding study submitted                                                  |                                   |                     |                                   |                   |                                   |                        |                                   |                       |                                   |                      |
| Representative feeding level (mg/kg bw/d, mg/kg DM for fish) and N rates | Level                             | Beef: N<br>Dairy: N | Level                             | Lamb: N<br>Ewe: N | Level                             | N rate<br>Breed/Finish | Level                             | B or T: N<br>Layer: N | Level                             | N rate<br>Carp/Trout |
|                                                                          | Estimated HR <sup>(a)</sup> at 1N | MRL proposals       | Estimated HR <sup>(a)</sup> at 1N | MRL proposals     | Estimated HR <sup>(a)</sup> at 1N | MRL proposals          | Estimated HR <sup>(a)</sup> at 1N | MRL proposals         | Estimated HR <sup>(a)</sup> at 1N | MRL proposals        |
| Muscle                                                                   | -                                 | -                   | -                                 | -                 | -                                 | -                      | -                                 | -                     | -                                 | -                    |
| Fat                                                                      | -                                 | -                   | -                                 | -                 | -                                 | -                      | -                                 | -                     | -                                 | -                    |
| Meat <sup>(b)</sup>                                                      | -                                 | -                   | -                                 | -                 | -                                 | -                      | -                                 | -                     | -                                 | -                    |
| Liver                                                                    | -                                 | -                   | -                                 | -                 | -                                 | -                      | -                                 | -                     | -                                 | -                    |
| Kidney                                                                   | -                                 | -                   | -                                 | -                 | -                                 | -                      | -                                 | -                     | -                                 | -                    |
| Milk <sup>(a)</sup>                                                      | -                                 | -                   | -                                 | -                 | -                                 | -                      | -                                 | -                     | -                                 | -                    |
| Eggs                                                                     | -                                 | -                   | -                                 | -                 | -                                 | -                      | -                                 | -                     | -                                 | -                    |
| Method of calculation <sup>(c)</sup>                                     |                                   |                     |                                   |                   |                                   |                        |                                   |                       |                                   |                      |

<sup>(a)</sup>: Estimated HR calculated at 1N level (**estimated mean level for milk**).

<sup>(b)</sup>: HR in meat calculated for mammalian on the basis of 20% fat + 80% muscle and 10% fat + 90% muscle for poultry

<sup>(c)</sup>: The OECD guidance document on residues in livestock (series on pesticides 73) recommends three different approaches to derive MRLs for animal products; by applying a transfer factor (Tf), by intrapolation (It) or by linear regression (Ln). Fill in method(s) considered to derive the MRL proposals.

| STMR calculations<br>Median expected intake<br>(mg/kg bw/d)<br>(mg/kg DM for fish)<br>Representative feeding level (mg/kg bw/d, mg/kg DM for fish) and N rates | Ruminant                          |                                           |                                   |                                           | Pig/Swine                         |                                               | Poultry                           |                                           | Fish                              |                                           |
|----------------------------------------------------------------------------------------------------------------------------------------------------------------|-----------------------------------|-------------------------------------------|-----------------------------------|-------------------------------------------|-----------------------------------|-----------------------------------------------|-----------------------------------|-------------------------------------------|-----------------------------------|-------------------------------------------|
|                                                                                                                                                                | Beef cattle                       | -                                         | Ram/Ewe                           | -                                         | Breeding                          | -                                             | Broiler                           | -                                         | Carp                              | -                                         |
|                                                                                                                                                                | Dairy cattle                      | -                                         | Lamb                              | -                                         | Finishing                         | -                                             | Layer                             | -                                         | Trout                             | -                                         |
|                                                                                                                                                                |                                   |                                           |                                   |                                           |                                   |                                               | Turkey                            | -                                         |                                   |                                           |
|                                                                                                                                                                | Level                             | Beef: N<br>Dairy: N                       | Level                             | Lamb : N<br>Ewe: N                        | Level                             | N rate<br>Breed/Fin<br>ish                    | Level                             | B or T: N<br>Layer: N                     | Level                             | N rate<br>Carp/Tro<br>ut                  |
|                                                                                                                                                                | Mean level<br>in feeding<br>level | Estimated<br>STMR <sup>(b)</sup><br>at 1N | Mean level<br>in feeding<br>level | Estimated<br>STMR <sup>(b)</sup><br>at 1N | Mean level<br>in feeding<br>level | Estimate<br>d<br>STMR <sup>(b)</sup><br>at 1N | Mean level<br>in feeding<br>level | Estimated<br>STMR <sup>(b)</sup><br>at 1N | Mean level<br>in feeding<br>level | Estimated<br>STMR <sup>(b)</sup><br>at 1N |
| Muscle                                                                                                                                                         | -                                 | -                                         | -                                 | -                                         | -                                 | -                                             | -                                 | -                                         | -                                 | -                                         |
| Fat                                                                                                                                                            | -                                 | -                                         | -                                 | -                                         | -                                 | -                                             | -                                 | -                                         | -                                 | -                                         |
| Meat <sup>(a)</sup>                                                                                                                                            | -                                 | -                                         | -                                 | -                                         | -                                 | -                                             | -                                 | -                                         | -                                 | -                                         |
| Liver                                                                                                                                                          | -                                 | -                                         | -                                 | -                                         | -                                 | -                                             | -                                 | -                                         | -                                 | -                                         |
| Kidney                                                                                                                                                         | -                                 | -                                         | -                                 | -                                         | -                                 | -                                             | -                                 | -                                         | -                                 | -                                         |
| Milk                                                                                                                                                           | -                                 | -                                         | -                                 | -                                         | -                                 | -                                             | -                                 | -                                         | -                                 | -                                         |
| Eggs                                                                                                                                                           | -                                 | -                                         | -                                 | -                                         | -                                 | -                                             | -                                 | -                                         | -                                 | -                                         |
| Method of calculation <sup>(c)</sup>                                                                                                                           |                                   |                                           |                                   |                                           |                                   |                                               |                                   |                                           |                                   |                                           |

<sup>(a)</sup>: STMR in meat calculated for mammalian on the basis of 20% fat + 80% muscle and 10% fat + 90% muscle for poultry

<sup>(b)</sup>: When the mean level is set at the LOQ, the STMR is set at the LOQ.

<sup>(c)</sup>: The OECD guidance document on residues in livestock (series on pesticide 73) recommends three different approaches to derive MRLs for animal products; by applying a transfer factor (Tf), by intrapolation (It) or by linear regression (Ln). Fill in method(s) considered to derive the MRL proposals.

## Conversion Factors (CF) for monitoring to risk assessment

Not relevant

### Processing factors (Regulation (EU) N° 283/2013, Annex Part A, points 6.5.2 and 6.5.3)

#### OECD Guideline 508 and OECD Guidance, series on testing and assessment No 96

| Crop (RAC)/Edible part or Crop (RAC)/Processed product | Number of studies <sup>(a)</sup> | Processing Factor (PF) |           | Conversion Factor (CF <sub>p</sub> ) for RA <sup>(b)</sup> |
|--------------------------------------------------------|----------------------------------|------------------------|-----------|------------------------------------------------------------|
|                                                        |                                  | Individual values      | Median PF |                                                            |
| No studies submitted, not required                     |                                  |                        |           |                                                            |

<sup>(a)</sup>: Studies with residues in the RAC at or close to the LOQ should be disregarded (unless concentration)

<sup>(b)</sup>: When the residue definition for risk assessment differs from the residue definition for monitoring

### Consumer risk assessment (Regulation (EU) N° 283/2013, Annex Part A, point 6.9) Including all uses (representative uses and uses related to an MRL application).

#### ADI

TMDI according to EFSA PRIMo

NTMDI, according to (to be specified)

IEDI (% ADI), according to EFSA PRIMo

NEDI (% ADI), according to (to be specified)

Factors included in the calculations

#### ARfD

IESTI (% ARfD), according to EFSA PRIMo

NESTI (% ARfD), according to (to be specified)

Factors included in IESTI and NESTI

|              |
|--------------|
| Not required |
| Not required |
| Not required |
| Not required |
| Not required |
|              |
| Not required |
| Not required |
| Not required |
|              |

### Proposed MRLs (Regulation (EU) No 283/2013, Annex Part A, points 6.7.2 and 6.7.3)

Since laminarin is a natural oligosaccharide and an ADI and/or ARfD are not necessary, it is proposed to maintain the MRL exemption through the inclusion in Annex IV of Regulation (EC) 396/2005, provided it can be demonstrated that consumer exposure to iodine and arsenic will be acceptable. (assessment pending data gap)

(a): Commodity code number, as listed in Annex I of Regulation (EC) No 396/2005

(b): MRLs proposed at the LOQ, should be annotated by an asterisk (\*) after the figure.

## Environmental fate and behaviour

### Route of degradation (aerobic) in soil (Regulation (EU) N° 283/2013, Annex Part A, point 7.1.1.1)

Mineralisation after 100 days

No study submitted, not required. Laminarin is a polysaccharide which leads to smaller-sized oligosaccharides and monosaccharides (glucose) after degradation

Non-extractable residues after 100 days

No study submitted, not required.

Metabolites requiring further consideration - name and/or code, % of applied (range and maximum)

Laminarin is a polysaccharide which leads to smaller-sized oligosaccharides and monosaccharides (glucose) after degradation. No other relevant metabolites, degradation or reaction products are expected to occur.

### Route of degradation (anaerobic) in soil (Regulation (EU) N° 283/2013, Annex Part A, point 7.1.1.2)

Mineralisation after 100 days

No study submitted, not required.

Non-extractable residues after 100 days

No study submitted, not required.

Metabolites that may require further consideration for risk assessment - name and/or code, % of applied (range and maximum)

No relevant metabolites, degradation or reaction products are expected to occur.

### Route of degradation (photolysis) on soil (Regulation (EU) N° 283/2013, Annex Part A, point 7.1.1.3)

Metabolites that may require further consideration for risk assessment - name and/or code, % of applied (range and maximum)

Laminarin has a low molar absorption coefficient ( $\epsilon = 160 \text{ dm}^3 \cdot \text{mol}^{-1} \cdot \text{cm}^{-1}$ ), no photo degradation is expected to occur. No metabolites.

Mineralisation at study end

No study submitted, not required.

Non-extractable residues at study end

No study submitted, not required.

### Rate of degradation in soil (aerobic) laboratory studies active substance (Regulation (EU) N° 283/2013, Annex Part A, point 7.1.2.1.1 and Regulation (EU) N° 284/2013, Annex Part A, point 9.1.1.1)

| Parent<br>Soil type    | Dark aerobic conditions |                   |                                           |                                                          |                     |                          |
|------------------------|-------------------------|-------------------|-------------------------------------------|----------------------------------------------------------|---------------------|--------------------------|
|                        | pH                      | t. °C / %<br>MWHC | DT <sub>50</sub> /DT <sub>90</sub><br>(d) | DT <sub>50</sub> (d)<br>20 °C<br>pF2/10kPa <sup>a)</sup> | St.<br>( $\chi^2$ ) | Method of<br>calculation |
| no study, not required | -                       | 12                | 30 (default) <sup>1</sup>                 | 14.1 (default) <sup>2</sup>                              |                     |                          |

<sup>1</sup> ECHA (2016), Guidance on information requirements and Chemical Safety Assessment Chapter R.16: Environmental exposure assessment (version 3.0, February 2016), for readily biodegradable substance.

<sup>2</sup> Normalised value with Q10 of 2.58 from 12°C

<sup>a)</sup> Normalised using a Q10 of 2.58 and Walker equation coefficient of 0.7

### Soil accumulation (Regulation (EU) N° 283/2013, Annex Part A, point 7.1.2.2 and Regulation (EU) N° 284/2013, Annex Part A, point 9.1.1.2.2)

Soil accumulation and plateau concentration no study, not required

### Rate of degradation on soil (photolysis) laboratory active substance (Regulation (EU) N° 283/2013, Annex Part A, point 7.1.1.3)

| Parent                 | Soil photolysis |                |                                                            |                       |                       |
|------------------------|-----------------|----------------|------------------------------------------------------------|-----------------------|-----------------------|
| Soil type              | pH              | t. °C / % MWHC | DT <sub>50</sub> / DT <sub>90</sub> (d) calculated at 50°N | St. (χ <sup>2</sup> ) | Method of calculation |
| no study, not required | -               | -              | -                                                          | -                     | -                     |

### Soil adsorption active substance (Regulation (EU) N° 283/2013, Annex Part A, point 7.1.3.1.1 and Regulation (EU) N° 284/2013, Annex Part A, point 9.1.2.1)

| Parent             |      |                       |                       |                         |                       |                         |     |  |
|--------------------|------|-----------------------|-----------------------|-------------------------|-----------------------|-------------------------|-----|--|
| Soil Type          | OC % | Soil pH <sup>a)</sup> | K <sub>d</sub> (mL/g) | K <sub>doc</sub> (mL/g) | K <sub>F</sub> (mL/g) | K <sub>Foc</sub> (mL/g) | 1/n |  |
| no study, Data gap | -    | -                     | -                     | -                       | -                     | -                       | -   |  |

<sup>a)</sup> Measured in [medium to be stated, usually calcium chloride solution or water]

\*Only relevant after implementation of the published EFSA guidance.

### Mobility in soil column leaching active substance (Regulation (EU) N° 283/2013, Annex Part A, point 7.1.4.1.1 and Regulation (EU) N° 284/2013, Annex Part A, point 9.1.2.1)

Column leaching no study, not required

### Lysimeter / field leaching studies (Regulation (EU) N° 283/2013, Annex Part A, points 7.1.4.2 / 7.1.4.3 and Regulation (EU) N° 284/2013, Annex Part A, points 9.1.2.2 / 9.1.2.3)

Lysimeter/ field leaching studies no study, not required

### Hydrolytic degradation (Regulation (EU) N° 283/2013, Annex Part A, point 7.2.1.1)

Hydrolytic degradation of the active substance and metabolites > 10 %

pH 4: stable at 20 °C less than 10% degradation

pH 7: stable at 20 °C less than 10% degradation

pH 9: stable at 20 °C less than 10% degradation

### Aqueous photochemical degradation (Regulation (EU) N° 283/2013, Annex Part A, points 7.2.1.2 / 7.2.1.3)

Photolytic degradation of active substance and metabolites above 10 %

stable due to its low molar absorption coefficient

Quantum yield of direct phototransformation in water at  $\Sigma > 290$  nm

not relevant

### 'Ready biodegradability' (Regulation (EU) N° 283/2013, Annex Part A, point 7.2.2.1)

Readily biodegradable  
(yes/no)

Yes. (based on the available study)

### Aerobic mineralisation in surface water (Regulation (EU) N° 283/2013, Annex Part A, point 7.2.2.2 and Regulation (EU) N° 284/2013, Annex Part A, point 9.2.1)

| Parent                                                     |                |                      |                     |                                                                         |                                  |                       |                                                         |                                   |                       |                       |
|------------------------------------------------------------|----------------|----------------------|---------------------|-------------------------------------------------------------------------|----------------------------------|-----------------------|---------------------------------------------------------|-----------------------------------|-----------------------|-----------------------|
| System identifier<br>(indicate fresh, estuarine or marine) | pH water phase | pH sed <sup>a)</sup> | t. °C <sup>b)</sup> | DT <sub>50</sub> /DT <sub>90</sub> whole sys. (suspended sediment test) |                                  | St. (χ <sup>2</sup> ) | DT <sub>50</sub> /DT <sub>90</sub> Water (pelagic test) |                                   | St. (χ <sup>2</sup> ) | Method of calculation |
|                                                            |                |                      |                     | At study temp                                                           | Normalised to x °C <sup>c)</sup> |                       | At study temp                                           | Normalised to 12 °C <sup>c)</sup> |                       |                       |
| Data Gap                                                   | -              | -                    | -                   | -                                                                       | -                                | -                     | -                                                       | -                                 | -                     | -                     |

<sup>a)</sup> Measured in [medium to be stated, usually calcium chloride solution or water]

<sup>b)</sup> Temperature of incubation=temperature that the environmental media was collected or std temperature of 20°C

<sup>c)</sup> Normalised using a Q10 of 2.58

### Water / sediment study (Regulation (EU) N° 283/2013, Annex Part A, point 7.2.2.3 and Regulation (EU) N° 284/2013, Annex Part A, point 9.2.2)

| Parent                  | Distribution   |        |       |                                               |                       |                                           |                       |                                        |                       |                       |
|-------------------------|----------------|--------|-------|-----------------------------------------------|-----------------------|-------------------------------------------|-----------------------|----------------------------------------|-----------------------|-----------------------|
| Water / sediment system | pH water phase | pH sed | t. °C | DT <sub>50</sub> /DT <sub>90</sub> whole sys. | St. (χ <sup>2</sup> ) | DT <sub>50</sub> /DT <sub>90</sub> Water* | St. (χ <sup>2</sup> ) | DT <sub>50</sub> /DT <sub>90</sub> sed | St. (χ <sup>2</sup> ) | Method of calculation |
| no study, not required  | -              | -      | 12° C | -                                             | -                     | 15*                                       | -                     | 300*                                   | -                     | -                     |

\* A value of 15 days at 12°C could be considered here, based upon the ECHA (2016) Guidance on information requirements and Chemical Safety Assessment Chapter R.16: Environmental exposure assessment (version 3.0, February 2016),. Values for readily biodegradable substances. Normalised using a Q10 of 2.58 to FOCUS reference conditions (20°C) the water DT50 is 7.1 days and sediment DT50 is 141.2 days.

### Fate and behaviour in air (Regulation (EU) N° 283/2013, Annex Part A, point 7.3.1)

Direct photolysis in air

Not studied - no data requested

Photochemical oxidative degradation in air

0.044 days (AOPWIN v.1.92) assuming a hydroxyl radical concentration of  $1.5 \times 10^6$  OH/cm<sup>3</sup>

Volatilisation

from plant surfaces: -

from soil: -

Metabolites

none

### Residues requiring further assessment (Regulation (EU) N° 283/2013, Annex Part A, point 7.4.1)

Environmental occurring residues requiring further assessment by other disciplines

Soil:Laminarin  
Surface water:Laminarin



(toxicology and ecotoxicology) and or requiring consideration for groundwater exposure

Sediment: Laminarin  
Ground water: Laminarin  
Air: Laminarin

### Definition of the residue for monitoring (Regulation (EU) N° 283/2013, Annex Part A, point 7.4.2)

See section 5, Ecotoxicology

### Monitoring data, if available (Regulation (EU) N° 283/2013, Annex Part A, point 7.5)

Soil (indicate location and type of study)

no monitoring data available, not required

Surface water (indicate location and type of study)

no monitoring data available, not required

Ground water (indicate location and type of study)

no monitoring data available, not required

Air (indicate location and type of study)

no monitoring data available, not required

### PEC soil (Regulation (EU) N° 284/2013, Annex Part A, points 9.1.3 / 9.3.1)

Parent

DT<sub>50</sub> (d): 30 days

Method of calculation

Kinetics: not applicable

Field or Lab: not relevant

Application data

Crop: lettuce

Depth of soil layer: 5cm

Soil bulk density: 1.5g/cm<sup>3</sup>

% plant interception: 25%

Number of applications: 16

Interval (d): 7

Application rate(s): 113 g a.s./ha

| PEC <sub>(s)</sub><br>(mg/kg) | Single application | Single application    | Multiple application | Multiple application  |
|-------------------------------|--------------------|-----------------------|----------------------|-----------------------|
|                               | Actual             | Time weighted average | Actual               | Time weighted average |
| Initial                       | n.c.               |                       | 0.700                |                       |
| Short term 24h                | n.c.               | n.c.                  | 0.684                | 0.692                 |
| 2d                            | n.c.               | n.c.                  | 0.668                | 0.684                 |
| 4d                            | n.c.               | n.c.                  | 0.638                | 0.668                 |
| Long term 7d                  | n.c.               | n.c.                  | 0.595                | 0.646                 |
| 28d                           | n.c.               | n.c.                  | 0.366                | 0.515                 |
| 50d                           | n.c.               | n.c.                  | 0.265                | 0.448                 |
| 100d                          | n.c.               | n.c.                  | 0.069                | 0.273                 |
| Plateau concentration         | n.r.               |                       |                      |                       |

### PEC ground water (Regulation (EU) N° 284/2013, Annex Part A, point 9.2.4.1)

Method of calculation and type of study (*e.g.* modelling, field leaching, lysimeter)

Calculations using a reliable soil adsorption measurement were not available. Data gap.

Application rate

-

### PEC surface water and PEC sediment (Regulation (EU) N° 284/2013, Annex Part A, points 9.2.5 / 9.3.1)

Parent

Parameters used in FOCUSsw step 1 and 2

Version control no. of FOCUS calculator: v1.1

Molecular weight 3240-4860 (g/mol):

$K_{OC}/K_{OM}$  (mL/g): 93.6/54.3 (QSAR Koc Values MCI methods)

DT<sub>50</sub> soil (d): 30 days (default)

DT<sub>50</sub> water/sediment system (d): 15 d (default)

DT<sub>50</sub> water (d): 15 d (ECHA guidance)

DT<sub>50</sub> sediment (d): 300 d (ECHA guidance)

Crop interception (%): minimal crop cover

Parameters used in FOCUSsw step 3 (if performed)

not calculated

Application rate

Crop and growth stage: orchards/ vines/ fruiting vegetables BBCH 11-89; leafy vegetables BBCH 16-49

Number of applications: orchards 20; vines 10; vegetables 7

Interval (d): orchards/vegetables 7; vines 10

Application rate(s): orchards 45 g a.s./ha; vines 90 g a.s./ha; vegetables 135 g a.s./ha

Application window: Orchards and vines: March-May, June-Sept, Oct-Feb; vegetables (leafy/fruiting) March-May, June-Sept, Oct-Feb, Minimal crop cover, Average crop cover

| FOCUS STEP 1<br>Scenario<br>orchards early | Day after<br>overall<br>maximum | PEC <sub>SW</sub> (µg/L) |          | PEC <sub>SED</sub> (µg/kg) |          |
|--------------------------------------------|---------------------------------|--------------------------|----------|----------------------------|----------|
|                                            |                                 | Actual                   | TWA      | Actual                     | TWA      |
|                                            | 0                               | 354.3051                 |          | 249.6444                   |          |
|                                            | 1                               | 343.7913                 | 349.0482 | 321.7887                   | 285.7165 |
|                                            | 2                               | 342.9979                 | 346.2214 | 321.0461                   | 303.5669 |
|                                            | 4                               | 341.4166                 | 344.2140 | 319.5659                   | 311.9362 |
|                                            | 7                               | 339.0583                 | 342.5092 | 317.3585                   | 314.7325 |
|                                            | 14                              | 333.6186                 | 339.4202 | 312.2670                   | 314.7692 |
|                                            | 21                              | 328.2663                 | 336.5919 | 307.2572                   | 313.0979 |
|                                            | 28                              | 322.9998                 | 333.8504 | 302.3278                   | 311.0199 |
|                                            | 42                              | 312.7189                 | 328.5108 | 292.7049                   | 306.5101 |
|                                            | 50                              | 306.9918                 | 325.5245 | 287.3443                   | 303.8711 |
|                                            | 100                             | 273.4986                 | 307.7237 | 255.9947                   | 287.6194 |

| FOCUS STEP 1<br>Scenario<br>orchards late | Day after<br>overall<br>maximum | PEC <sub>SW</sub> (µg/L) |          | PEC <sub>SED</sub> (µg/kg) |          |
|-------------------------------------------|---------------------------------|--------------------------|----------|----------------------------|----------|
|                                           |                                 | Actual                   | TWA      | Actual                     | TWA      |
|                                           | 0                               | 313.8891                 |          | 249.6444                   |          |
|                                           | 1                               | 307.9426                 | 310.9158 | 288.2342                   | 268.9393 |
|                                           | 2                               | 307.2319                 | 309.2514 | 287.5690                   | 278.4204 |
|                                           | 4                               | 305.8154                 | 307.8873 | 286.2432                   | 282.6630 |
|                                           | 7                               | 303.7030                 | 306.5462 | 284.2660                   | 283.7732 |
|                                           | 14                              | 298.8306                 | 303.9032 | 279.7054                   | 282.8764 |
|                                           | 21                              | 294.0364                 | 301.4111 | 275.2180                   | 281.0695 |
|                                           | 28                              | 289.3190                 | 298.9762 | 270.8026                   | 279.0532 |
|                                           | 42                              | 280.1102                 | 294.2141 | 262.1832                   | 274.8587 |
|                                           | 50                              | 274.9802                 | 291.5458 | 257.3815                   | 272.4453 |
|                                           | 100                             | 244.9795                 | 275.6185 | 229.3008                   | 257.7581 |

| FOCUS STEP 2<br>Scenario<br>orchards early<br>minimal crop<br>cover<br>March-May | Day after<br>overall<br>maximum | PEC <sub>SW</sub> (µg/L) |         | PEC <sub>SED</sub> (µg/kg) |         |
|----------------------------------------------------------------------------------|---------------------------------|--------------------------|---------|----------------------------|---------|
|                                                                                  |                                 | Actual                   | TWA     | Actual                     | TWA     |
| Northern EU                                                                      | 0                               | 22.4854                  |         | 20.6856                    |         |
|                                                                                  | 1                               | 21.1508                  | 21.8181 | 19.8498                    | 20.2677 |
|                                                                                  | 2                               | 20.2962                  | 21.2708 | 19.0478                    | 19.8582 |
|                                                                                  | 4                               | 18.6892                  | 20.3776 | 17.5397                    | 19.0721 |
|                                                                                  | 7                               | 16.5142                  | 19.1794 | 15.4984                    | 17.9699 |
|                                                                                  | 14                              | 12.3730                  | 16.7628 | 11.6120                    | 15.7168 |
|                                                                                  | 21                              | 9.2703                   | 14.7581 | 8.7001                     | 13.8404 |
|                                                                                  | 28                              | 6.9457                   | 13.0819 | 6.5184                     | 12.2698 |
|                                                                                  | 42                              | 3.8990                   | 10.4803 | 3.6592                     | 9.8307  |
|                                                                                  | 50                              | 2.8032                   | 9.3349  | 2.6308                     | 8.7566  |
| 100                                                                              | 0.3565                          | 5.2608                   | 0.3346  | 4.9351                     |         |
| Southern EU                                                                      | 0                               | 34.9995                  |         | 32.3717                    |         |
|                                                                                  | 1                               | 33.0997                  | 34.0496 | 31.0637                    | 31.7177 |
|                                                                                  | 2                               | 31.7624                  | 33.2403 | 29.8087                    | 31.0770 |
|                                                                                  | 4                               | 29.2476                  | 31.8662 | 27.4485                    | 29.8467 |
|                                                                                  | 7                               | 25.8437                  | 30.0011 | 24.2541                    | 28.1218 |
|                                                                                  | 14                              | 19.3631                  | 26.2260 | 18.1720                    | 24.5959 |
|                                                                                  | 21                              | 14.5075                  | 23.0910 | 13.6152                    | 21.6594 |
|                                                                                  | 28                              | 10.8696                  | 20.4690 | 10.2010                    | 19.2015 |
|                                                                                  | 42                              | 6.1017                   | 16.3989 | 5.7264                     | 15.3845 |
|                                                                                  | 50                              | 4.3869                   | 14.6067 | 4.1171                     | 13.7035 |
| 100                                                                              | 0.5579                          | 8.2319                   | 0.5236  | 7.7232                     |         |

| FOCUS STEP 2<br>Scenario<br>orchards Early<br>minimal crop<br>cover<br>June-<br>September | Day after<br>overall<br>maximum | PEC <sub>SW</sub> (µg/L) |         | PEC <sub>SED</sub> (µg/kg) |         |
|-------------------------------------------------------------------------------------------|---------------------------------|--------------------------|---------|----------------------------|---------|
|                                                                                           |                                 | Actual                   | TWA     | Actual                     | TWA     |
| Northern EU                                                                               | 0                               | 22.4854                  |         | 20.6856                    |         |
|                                                                                           | 1                               | 21.1508                  | 21.8181 | 19.8498                    | 20.2677 |
|                                                                                           | 2                               | 20.2962                  | 21.2708 | 19.0478                    | 19.8582 |
|                                                                                           | 4                               | 18.6892                  | 20.3776 | 17.5397                    | 19.0721 |

| FOCUS STEP 2<br>Scenario<br>orchards Early<br>minimal crop<br>cover<br>June-<br>September | Day after<br>overall<br>maximum | PEC <sub>SW</sub> (µg/L) |         | PEC <sub>SED</sub> (µg/kg) |         |
|-------------------------------------------------------------------------------------------|---------------------------------|--------------------------|---------|----------------------------|---------|
|                                                                                           |                                 | Actual                   | TWA     | Actual                     | TWA     |
|                                                                                           | 7                               | 16.5142                  | 19.1794 | 15.4984                    | 17.9699 |
|                                                                                           | 14                              | 12.3730                  | 16.7628 | 11.6120                    | 15.7168 |
|                                                                                           | 21                              | 9.2703                   | 14.7581 | 8.7001                     | 13.8404 |
|                                                                                           | 28                              | 6.9457                   | 13.0819 | 6.5184                     | 12.2698 |
|                                                                                           | 42                              | 3.8990                   | 10.4803 | 3.6592                     | 9.8307  |
|                                                                                           | 50                              | 2.8032                   | 9.3349  | 2.6308                     | 8.7566  |
|                                                                                           | 100                             | 0.3565                   | 5.2608  | 0.3346                     | 4.9351  |
| Southern EU                                                                               | 0                               | 28.7425                  |         | 26.5286                    |         |
|                                                                                           | 1                               | 27.1253                  | 27.9339 | 25.4568                    | 25.9927 |
|                                                                                           | 2                               | 26.0293                  | 27.2556 | 24.4282                    | 25.4676 |
|                                                                                           | 4                               | 23.9684                  | 26.1219 | 22.4941                    | 24.4594 |
|                                                                                           | 7                               | 21.1789                  | 24.5903 | 19.8762                    | 23.0459 |
|                                                                                           | 14                              | 15.8680                  | 21.4944 | 14.8920                    | 20.1563 |
|                                                                                           | 21                              | 11.8889                  | 18.9245 | 11.1576                    | 17.7499 |
|                                                                                           | 28                              | 8.9076                   | 16.7754 | 8.3597                     | 15.7356 |
|                                                                                           | 42                              | 5.0003                   | 13.4396 | 4.6928                     | 12.6076 |
|                                                                                           | 50                              | 3.5951                   | 11.9708 | 3.3739                     | 11.2300 |
|                                                                                           | 100                             | 0.4572                   | 6.7463  | 0.4291                     | 6.3291  |

| FOCUS STEP 2<br>Scenario<br>orchards Early<br>minimal crop<br>cover<br>Oct - Feb | Day after<br>overall<br>maximum | PEC <sub>SW</sub> (µg/L) |         | PEC <sub>SED</sub> (µg/kg) |         |
|----------------------------------------------------------------------------------|---------------------------------|--------------------------|---------|----------------------------|---------|
|                                                                                  |                                 | Actual                   | TWA     | Actual                     | TWA     |
| Northern EU                                                                      | 0                               | 41.2565                  |         | 38.2148                    |         |
|                                                                                  | 1                               | 39.0742                  | 40.1654 | 36.6707                    | 37.4427 |
|                                                                                  | 2                               | 37.4954                  | 39.2251 | 35.1891                    | 36.6863 |
|                                                                                  | 4                               | 34.5267                  | 37.6104 | 32.4030                    | 35.2340 |
|                                                                                  | 7                               | 30.5085                  | 35.4120 | 28.6319                    | 33.1978 |
|                                                                                  | 14                              | 22.8581                  | 30.9576 | 21.4521                    | 29.0354 |
|                                                                                  | 21                              | 17.1261                  | 27.2575 | 16.0727                    | 25.5689 |
|                                                                                  | 28                              | 12.8315                  | 24.1625 | 12.0422                    | 22.6673 |
|                                                                                  | 42                              | 7.2030                   | 19.3581 | 6.7600                     | 18.1614 |
|                                                                                  | 50                              | 5.1787                   | 17.2426 | 4.8602                     | 16.1770 |
|                                                                                  | 100                             | 0.6586                   | 9.7174  | 0.6181                     | 9.1172  |
| Southern EU                                                                      | 0                               | 34.9995                  |         | 32.3717                    |         |
|                                                                                  | 1                               | 33.0997                  | 34.0496 | 31.0637                    | 31.7177 |
|                                                                                  | 2                               | 31.7624                  | 33.2403 | 29.8087                    | 31.0770 |
|                                                                                  | 4                               | 29.2476                  | 31.8662 | 27.4485                    | 29.8467 |
|                                                                                  | 7                               | 25.8437                  | 30.0011 | 24.2541                    | 28.1218 |
|                                                                                  | 14                              | 19.3631                  | 26.2260 | 18.1720                    | 24.5959 |
|                                                                                  | 21                              | 14.5075                  | 23.0910 | 13.6152                    | 21.6594 |
|                                                                                  | 28                              | 10.8696                  | 20.4690 | 10.2010                    | 19.2015 |
|                                                                                  | 42                              | 6.1017                   | 16.3989 | 5.7264                     | 15.3845 |
|                                                                                  | 50                              | 4.3869                   | 14.6067 | 4.1171                     | 13.7035 |
|                                                                                  | 100                             | 0.5579                   | 8.2319  | 0.5236                     | 7.7232  |

| FOCUS STEP 1<br>Scenario vines<br>early | Day after<br>overall<br>maximum | PEC <sub>SW</sub> (µg/L) |          | PEC <sub>SED</sub> (µg/kg) |          |
|-----------------------------------------|---------------------------------|--------------------------|----------|----------------------------|----------|
|                                         |                                 | Actual                   | TWA      | Actual                     | TWA      |
|                                         | 0                               | 274.8111                 |          | 249.6444                   |          |
|                                         | 1                               | 273.2806                 | 274.0458 | 255.7906                   | 252.7175 |
|                                         | 2                               | 272.6499                 | 273.5055 | 255.2003                   | 254.1064 |
|                                         | 4                               | 271.3929                 | 272.7632 | 254.0237                   | 254.3590 |
|                                         | 7                               | 269.5182                 | 271.7737 | 252.2691                   | 253.8389 |
|                                         | 14                              | 265.1942                 | 269.5621 | 248.2218                   | 252.0394 |
|                                         | 21                              | 260.9396                 | 267.3951 | 244.2395                   | 250.1014 |
|                                         | 28                              | 256.7533                 | 265.2565 | 240.3211                   | 248.1448 |
|                                         | 42                              | 248.5810                 | 261.0527 | 232.6718                   | 244.2551 |
|                                         | 50                              | 244.0285                 | 258.6919 | 228.4106                   | 242.0599 |
|                                         | 100                             | 217.4047                 | 244.5761 | 203.4908                   | 228.8854 |

| FOCUS STEP 1<br>Scenario vines<br>late | Day after<br>overall<br>maximum | PEC <sub>SW</sub> (µg/L) |          | PEC <sub>SED</sub> (µg/kg) |          |
|----------------------------------------|---------------------------------|--------------------------|----------|----------------------------|----------|
|                                        |                                 | Actual                   | TWA      | Actual                     | TWA      |
|                                        | 0                               | 290.7981                 |          | 249.6444                   |          |
|                                        | 1                               | 287.4609                 | 289.1295 | 269.0634                   | 259.3539 |
|                                        | 2                               | 286.7975                 | 288.1293 | 268.4425                   | 264.0534 |
|                                        | 4                               | 285.4753                 | 287.1326 | 267.2049                   | 265.9383 |
|                                        | 7                               | 283.5034                 | 285.9993 | 265.3592                   | 266.0852 |
|                                        | 14                              | 278.9550                 | 283.6112 | 261.1019                   | 264.6550 |
|                                        | 21                              | 274.4797                 | 281.3112 | 256.9130                   | 262.7706 |
|                                        | 28                              | 270.0761                 | 279.0514 | 252.7912                   | 260.7896 |
|                                        | 42                              | 261.4798                 | 274.6192 | 244.7451                   | 256.7752 |
|                                        | 50                              | 256.6910                 | 272.1326 | 240.2628                   | 254.4907 |
|                                        | 100                             | 228.6857                 | 257.2757 | 214.0498                   | 240.6973 |

| FOCUS STEP 2<br>Scenario Vines<br>early minimal<br>crop cover<br>March-May | Day after<br>overall<br>maximum | PEC <sub>SW</sub> (µg/L) |         | PEC <sub>SED</sub> (µg/kg) |         |
|----------------------------------------------------------------------------|---------------------------------|--------------------------|---------|----------------------------|---------|
|                                                                            |                                 | Actual                   | TWA     | Actual                     | TWA     |
| Northern EU                                                                | 0                               | 14.2341                  |         | 13.2456                    |         |
|                                                                            | 1                               | 13.5435                  | 13.8888 | 12.7104                    | 12.9780 |
|                                                                            | 2                               | 12.9963                  | 13.5793 | 12.1969                    | 12.7158 |
|                                                                            | 4                               | 11.9673                  | 13.0279 | 11.2312                    | 12.2124 |
|                                                                            | 7                               | 10.5745                  | 12.2694 | 9.9241                     | 11.5067 |
|                                                                            | 14                              | 7.9228                   | 10.7278 | 7.4355                     | 10.0639 |
|                                                                            | 21                              | 5.9361                   | 9.4461  | 5.5709                     | 8.8624  |
|                                                                            | 28                              | 4.4475                   | 8.3738  | 4.1740                     | 7.8567  |
|                                                                            | 42                              | 2.4966                   | 6.7089  | 2.3431                     | 6.2949  |
|                                                                            | 50                              | 1.7950                   | 5.9758  | 1.6846                     | 5.6071  |
| Southern EU                                                                | 0                               | 26.9754                  |         | 25.1439                    |         |
|                                                                            | 1                               | 25.7094                  | 26.3424 | 24.1280                    | 24.6360 |
|                                                                            | 2                               | 24.6706                  | 25.7662 | 23.1531                    | 24.1383 |
|                                                                            | 4                               | 22.7173                  | 24.7251 | 21.3200                    | 23.1827 |
|                                                                            | 7                               | 20.0735                  | 23.2877 | 18.8388                    | 21.8430 |
|                                                                            | 14                              | 15.0398                  | 20.3629 | 14.1147                    | 19.1043 |
|                                                                            | 21                              | 11.2684                  | 17.9304 | 10.5752                    | 16.8234 |
|                                                                            | 28                              | 8.4427                   | 15.8950 | 7.9234                     | 14.9143 |
| 42                                                                         | 4.7393                          | 12.7349                  | 4.4478  | 11.9496                    |         |

| FOCUS STEP 2<br>Scenario Vines<br>early minimal<br>crop cover<br>March-May | Day after<br>overall<br>maximum | PEC <sub>SW</sub> (µg/L) |        | PEC <sub>SED</sub> (µg/kg) |        |
|----------------------------------------------------------------------------|---------------------------------|--------------------------|--------|----------------------------|--------|
|                                                                            |                                 | Actual                   | TWA    | Actual                     | TWA    |
|                                                                            |                                 | 50                       | 3.4074 | 11.3433                    | 3.1978 |
| 100                                                                        | 0.4334                          | 6.3929                   | 0.4067 | 5.9988                     |        |

| FOCUS STEP 2<br>Scenario Vines<br>early minimal<br>crop cover<br>June-<br>September | Day after<br>overall<br>maximum | PEC <sub>SW</sub> (µg/L) |         | PEC <sub>SED</sub> (µg/kg) |         |
|-------------------------------------------------------------------------------------|---------------------------------|--------------------------|---------|----------------------------|---------|
|                                                                                     |                                 | Actual                   | TWA     | Actual                     | TWA     |
|                                                                                     |                                 | Northern EU              | 0       | 14.2341                    |         |
|                                                                                     | 1                               | 13.5435                  | 13.8888 | 12.7104                    | 12.9780 |
|                                                                                     | 2                               | 12.9963                  | 13.5793 | 12.1969                    | 12.7158 |
|                                                                                     | 4                               | 11.9673                  | 13.0279 | 11.2312                    | 12.2124 |
|                                                                                     | 7                               | 10.5745                  | 12.2694 | 9.9241                     | 11.5067 |
|                                                                                     | 14                              | 7.9228                   | 10.7278 | 7.4355                     | 10.0639 |
|                                                                                     | 21                              | 5.9361                   | 9.4461  | 5.5709                     | 8.8624  |
|                                                                                     | 28                              | 4.4475                   | 8.3738  | 4.1740                     | 7.8567  |
|                                                                                     | 42                              | 2.4966                   | 6.7089  | 2.3431                     | 6.2949  |
|                                                                                     | 50                              | 1.7950                   | 5.9758  | 1.6846                     | 5.6071  |
|                                                                                     | 100                             | 0.2283                   | 3.3678  | 0.2142                     | 3.1601  |
| Southern EU                                                                         | 0                               | 20.6047                  |         | 19.1948                    |         |
|                                                                                     | 1                               | 19.6264                  | 20.1156 | 18.4192                    | 18.8070 |
|                                                                                     | 2                               | 18.8335                  | 19.6728 | 17.6750                    | 18.4270 |
|                                                                                     | 4                               | 17.3423                  | 18.8765 | 16.2756                    | 17.6976 |
|                                                                                     | 7                               | 15.3240                  | 17.7786 | 14.3814                    | 16.6748 |
|                                                                                     | 14                              | 11.4813                  | 15.5454 | 10.7751                    | 14.5841 |
|                                                                                     | 21                              | 8.6022                   | 13.6883 | 8.0731                     | 12.8429 |
|                                                                                     | 28                              | 6.4451                   | 12.1344 | 6.0487                     | 11.3855 |
|                                                                                     | 42                              | 3.6180                   | 9.7219  | 3.3954                     | 9.1222  |
|                                                                                     | 50                              | 2.6012                   | 8.6596  | 2.4412                     | 8.1255  |
|                                                                                     | 100                             | 0.3308                   | 4.8803  | 0.3105                     | 4.5794  |

| FOCUS STEP 2<br>Scenario Vines<br>early minimal<br>crop cover<br>Oct-Feb | Day after<br>overall<br>maximum | PEC <sub>SW</sub> (µg/L) |         | PEC <sub>SED</sub> (µg/kg) |         |
|--------------------------------------------------------------------------|---------------------------------|--------------------------|---------|----------------------------|---------|
|                                                                          |                                 | Actual                   | TWA     | Actual                     | TWA     |
|                                                                          |                                 | Northern EU              | 0       | 33.3460                    |         |
|                                                                          | 1                               | 31.7924                  | 32.5692 | 29.8368                    | 30.4650 |
|                                                                          | 2                               | 30.5078                  | 31.8597 | 28.6313                    | 29.8495 |
|                                                                          | 4                               | 28.0924                  | 30.5737 | 26.3644                    | 28.6678 |
|                                                                          | 7                               | 24.8230                  | 28.7968 | 23.2961                    | 27.0111 |
|                                                                          | 14                              | 18.5983                  | 25.1805 | 17.4543                    | 23.6244 |
|                                                                          | 21                              | 13.9345                  | 22.1725 | 13.0774                    | 20.8039 |
|                                                                          | 28                              | 10.4402                  | 19.6557 | 9.7981                     | 18.4430 |
|                                                                          | 42                              | 5.8607                   | 15.7479 | 5.5002                     | 14.7769 |
|                                                                          | 50                              | 4.2136                   | 14.0271 | 3.9544                     | 13.1623 |
|                                                                          | 100                             | 0.5359                   | 7.9054  | 0.5029                     | 7.4181  |
| Southern EU                                                              | 0                               | 26.9754                  |         | 25.1439                    |         |
|                                                                          | 1                               | 25.7094                  | 26.3424 | 24.1280                    | 24.6360 |
|                                                                          | 2                               | 24.6706                  | 25.7662 | 23.1531                    | 24.1383 |

| FOCUS STEP 2<br>Scenario Vines<br>early minimal<br>crop cover<br>Oct-Feb | Day after<br>overall<br>maximum | PEC <sub>SW</sub> (µg/L) |         | PEC <sub>SED</sub> (µg/kg) |         |
|--------------------------------------------------------------------------|---------------------------------|--------------------------|---------|----------------------------|---------|
|                                                                          |                                 | Actual                   | TWA     | Actual                     | TWA     |
|                                                                          | 4                               | 22.7173                  | 24.7251 | 21.3200                    | 23.1827 |
|                                                                          | 7                               | 20.0735                  | 23.2877 | 18.8388                    | 21.8430 |
|                                                                          | 14                              | 15.0398                  | 20.3629 | 14.1147                    | 19.1043 |
|                                                                          | 21                              | 11.2684                  | 17.9304 | 10.5752                    | 16.8234 |
|                                                                          | 28                              | 8.4427                   | 15.8950 | 7.9234                     | 14.9143 |
|                                                                          | 42                              | 4.7393                   | 12.7349 | 4.4478                     | 11.9496 |
|                                                                          | 50                              | 3.4074                   | 11.3433 | 3.1978                     | 10.6439 |
|                                                                          | 100                             | 0.4334                   | 6.3929  | 0.4067                     | 5.9988  |

| FOCUS STEP 1<br>Scenario<br>Vegetables, | Day after<br>overall<br>maximum | PEC <sub>SW</sub> (µg/L) |          | PEC <sub>SED</sub> (µg/kg) |          |
|-----------------------------------------|---------------------------------|--------------------------|----------|----------------------------|----------|
|                                         |                                 | Actual                   | TWA      | Actual                     | TWA      |
|                                         | 0                               | 288.7406                 |          | 262.1266                   |          |
|                                         | 1                               | 287.1122                 | 287.9264 | 268.7370                   | 265.4318 |
|                                         | 2                               | 286.4496                 | 287.3536 | 268.1168                   | 266.9293 |
|                                         | 4                               | 285.1290                 | 286.5712 | 266.8807                   | 267.2138 |
|                                         | 7                               | 283.1595                 | 285.5306 | 265.0373                   | 266.6756 |
|                                         | 14                              | 278.6166                 | 283.2063 | 260.7852                   | 264.7905 |
|                                         | 21                              | 274.1467                 | 280.9294 | 256.6013                   | 262.7562 |
|                                         | 28                              | 269.7485                 | 278.6825 | 252.4846                   | 260.7015 |
|                                         | 42                              | 261.1626                 | 274.2658 | 244.4482                   | 256.6159 |
|                                         | 50                              | 256.3796                 | 271.7854 | 239.9713                   | 254.3098 |
|                                         | 100                             | 228.4082                 | 256.9551 | 213.7901                   | 240.4693 |

| FOCUS STEP 2<br>Scenario<br>Vegetables,<br>leafy and<br>fruiting minimal<br>crop cover<br>March - May | Day after<br>overall<br>maximum | PEC <sub>SW</sub> (µg/L) |         | PEC <sub>SED</sub> (µg/kg) |         |
|-------------------------------------------------------------------------------------------------------|---------------------------------|--------------------------|---------|----------------------------|---------|
|                                                                                                       |                                 | Actual                   | TWA     | Actual                     | TWA     |
| Northern EU                                                                                           | 0                               | 26.6942                  |         | 24.8697                    |         |
|                                                                                                       | 1                               | 25.4290                  | 26.0616 | 23.8649                    | 24.3673 |
|                                                                                                       | 2                               | 24.4016                  | 25.4885 | 22.9006                    | 23.8750 |
|                                                                                                       | 4                               | 22.4696                  | 24.4571 | 21.0875                    | 22.9299 |
|                                                                                                       | 7                               | 19.8546                  | 23.0346 | 18.6333                    | 21.6047 |
|                                                                                                       | 14                              | 14.8758                  | 20.1413 | 13.9608                    | 18.8959 |
|                                                                                                       | 21                              | 11.1455                  | 17.7352 | 10.4599                    | 16.6399 |
|                                                                                                       | 28                              | 8.3506                   | 15.7219 | 7.8369                     | 14.7516 |
|                                                                                                       | 42                              | 4.6877                   | 12.5962 | 4.3993                     | 11.8192 |
|                                                                                                       | 50                              | 3.3703                   | 11.2197 | 3.1630                     | 10.5278 |
| Southern EU                                                                                           | 0                               | 51.5225                  |         | 48.0553                    |         |
|                                                                                                       | 1                               | 49.1361                  | 50.3293 | 46.1137                    | 47.0845 |
|                                                                                                       | 2                               | 47.1508                  | 49.2363 | 44.2505                    | 46.1333 |
|                                                                                                       | 4                               | 43.4176                  | 47.2506 | 40.7470                    | 44.3070 |
|                                                                                                       | 7                               | 38.3646                  | 44.5053 | 36.0048                    | 41.7465 |
|                                                                                                       | 14                              | 28.7442                  | 38.9166 | 26.9761                    | 36.5122 |
|                                                                                                       | 21                              | 21.5362                  | 34.2679 | 20.2115                    | 32.1530 |
|                                                                                                       | 28                              | 16.1357                  | 30.3782 | 15.1432                    | 28.5043 |
|                                                                                                       | 42                              | 9.0579                   | 24.3387 | 8.5007                     | 22.8381 |

| FOCUS STEP 2<br>Scenario<br>Vegetables,<br>leafy and<br>fruiting minimal<br>crop cover<br>March - May | Day after<br>overall<br>maximum | PEC <sub>SW</sub> (µg/L) |        | PEC <sub>SED</sub> (µg/kg) |        |
|-------------------------------------------------------------------------------------------------------|---------------------------------|--------------------------|--------|----------------------------|--------|
|                                                                                                       |                                 | Actual                   | TWA    | Actual                     | TWA    |
|                                                                                                       |                                 | 50                       | 6.5123 | 21.6791                    | 6.1117 |
| 100                                                                                                   | 0.8282                          | 12.2180                  | 0.7773 | 11.4649                    |        |

| FOCUS STEP 2<br>Scenario<br>Vegetables,<br>leafy and<br>fruiting minimal<br>crop cover<br>June -Sep | Day after<br>overall<br>maximum | PEC <sub>SW</sub> (µg/L) |         | PEC <sub>SED</sub> (µg/kg) |         |
|-----------------------------------------------------------------------------------------------------|---------------------------------|--------------------------|---------|----------------------------|---------|
|                                                                                                     |                                 | Actual                   | TWA     | Actual                     | TWA     |
|                                                                                                     |                                 | Northern EU              | 0       | 26.6942                    |         |
|                                                                                                     | 1                               | 25.4290                  | 26.0616 | 23.8649                    | 24.3673 |
|                                                                                                     | 2                               | 24.4016                  | 25.4885 | 22.9006                    | 23.8750 |
|                                                                                                     | 4                               | 22.4696                  | 24.4571 | 21.0875                    | 22.9299 |
|                                                                                                     | 7                               | 19.8546                  | 23.0346 | 18.6333                    | 21.6047 |
|                                                                                                     | 14                              | 14.8758                  | 20.1413 | 13.9608                    | 18.8959 |
|                                                                                                     | 21                              | 11.1455                  | 17.7352 | 10.4599                    | 16.6399 |
|                                                                                                     | 28                              | 8.3506                   | 15.7219 | 7.8369                     | 14.7516 |
|                                                                                                     | 42                              | 4.6877                   | 12.5962 | 4.3993                     | 11.8192 |
|                                                                                                     | 50                              | 3.3703                   | 11.2197 | 3.1630                     | 10.5278 |
|                                                                                                     | 100                             | 0.4286                   | 6.3232  | 0.4023                     | 5.9334  |
| Southern EU                                                                                         | 0                               | 39.1084                  |         | 36.4625                    |         |
|                                                                                                     | 1                               | 37.2825                  | 38.1955 | 34.9893                    | 35.7259 |
|                                                                                                     | 2                               | 35.7762                  | 37.3624 | 33.5756                    | 35.0042 |
|                                                                                                     | 4                               | 32.9436                  | 35.8538 | 30.9172                    | 33.6184 |
|                                                                                                     | 7                               | 29.1096                  | 33.7700 | 27.3191                    | 31.6756 |
|                                                                                                     | 14                              | 21.8100                  | 29.5290 | 20.4684                    | 27.7041 |
|                                                                                                     | 21                              | 16.3408                  | 26.0016 | 15.3357                    | 24.3965 |
|                                                                                                     | 28                              | 12.2432                  | 23.0501 | 11.4901                    | 21.6279 |
|                                                                                                     | 42                              | 6.8728                   | 18.4675 | 6.4500                     | 17.3287 |
|                                                                                                     | 50                              | 4.9413                   | 16.4494 | 4.6373                     | 15.4352 |
|                                                                                                     | 100                             | 0.6284                   | 9.2706  | 0.5898                     | 8.6991  |

| FOCUS STEP 2<br>Scenario<br>Vegetables,<br>leafy and<br>fruiting minimal<br>crop cover<br>Oct - Feb | Day after<br>overall<br>maximum | PEC <sub>SW</sub> (µg/L) |         | PEC <sub>SED</sub> (µg/kg) |         |
|-----------------------------------------------------------------------------------------------------|---------------------------------|--------------------------|---------|----------------------------|---------|
|                                                                                                     |                                 | Actual                   | TWA     | Actual                     | TWA     |
|                                                                                                     |                                 | Northern EU              | 0       | 63.9366                    |         |
|                                                                                                     | 1                               | 60.9896                  | 62.4631 | 57.2381                    | 58.4431 |
|                                                                                                     | 2                               | 58.5254                  | 61.1103 | 54.9255                    | 57.2624 |
|                                                                                                     | 4                               | 53.8916                  | 58.6474 | 50.5767                    | 54.9956 |
|                                                                                                     | 7                               | 47.6197                  | 55.2406 | 44.6906                    | 51.8173 |
|                                                                                                     | 14                              | 35.6784                  | 48.3043 | 33.4838                    | 45.3204 |
|                                                                                                     | 21                              | 26.7316                  | 42.5343 | 25.0873                    | 39.9096 |
|                                                                                                     | 28                              | 20.0283                  | 37.7063 | 18.7963                    | 35.3806 |
|                                                                                                     | 42                              | 11.2430                  | 30.2100 | 10.5514                    | 28.3475 |



| FOCUS STEP 2<br>Scenario<br>Vegetables,<br>leafy and<br>fruiting minimal<br>crop cover<br>Oct - Feb | Day after<br>overall<br>maximum | PEC <sub>SW</sub> (µg/L) |         | PEC <sub>SED</sub> (µg/kg) |         |
|-----------------------------------------------------------------------------------------------------|---------------------------------|--------------------------|---------|----------------------------|---------|
|                                                                                                     |                                 | Actual                   | TWA     | Actual                     | TWA     |
|                                                                                                     | 50                              | 8.0833                   | 26.9088 | 7.5861                     | 25.2501 |
|                                                                                                     | 100                             | 1.0280                   | 15.1653 | 0.9648                     | 14.2307 |
| Southern EU                                                                                         | 0                               | 51.5225                  |         | 48.0553                    |         |
|                                                                                                     | 1                               | 49.1361                  | 50.3293 | 46.1137                    | 47.0845 |
|                                                                                                     | 2                               | 47.1508                  | 49.2363 | 44.2505                    | 46.1333 |
|                                                                                                     | 4                               | 43.4176                  | 47.2506 | 40.7470                    | 44.3070 |
|                                                                                                     | 7                               | 38.3646                  | 44.5053 | 36.0048                    | 41.7465 |
|                                                                                                     | 14                              | 28.7442                  | 38.9166 | 26.9761                    | 36.5122 |
|                                                                                                     | 21                              | 21.5362                  | 34.2679 | 20.2115                    | 32.1530 |
|                                                                                                     | 28                              | 16.1357                  | 30.3782 | 15.1432                    | 28.5043 |
|                                                                                                     | 42                              | 9.0579                   | 24.3387 | 8.5007                     | 22.8381 |
|                                                                                                     | 50                              | 6.5123                   | 21.6791 | 6.1117                     | 20.3427 |
|                                                                                                     | 100                             | 0.8282                   | 12.2180 | 0.7773                     | 11.4649 |

### Estimation of concentrations from other routes of exposure (Regulation (EU) N° 284/2013, Annex Part A, point 9.4)

Method of calculation

not relevant

### Ecotoxicology

#### Effects on birds and other terrestrial vertebrates (Regulation (EU) N° 283/2013, Annex Part A, point 8.1 and Regulation (EU) N° 284/2013, Annex Part A, point 10.1)

| Species                                                                                                                        | Test substance | Time scale               | End point            | Toxicity (mg/kg bw per day) |
|--------------------------------------------------------------------------------------------------------------------------------|----------------|--------------------------|----------------------|-----------------------------|
| <b>Birds</b>                                                                                                                   |                |                          |                      |                             |
| Bobwhite quail                                                                                                                 | a.s.           | Acute                    | LD <sub>50</sub>     | > 1700                      |
|                                                                                                                                | Preparation    | Acute                    | LD <sub>50</sub>     | None submitted or required  |
|                                                                                                                                | a.s.           | Long-term                | LD <sub>50</sub> /10 | > 170                       |
|                                                                                                                                | a.s.           | Long-term                | NOEC/NOAEC/NOAEL     | None submitted.             |
| <b>Mammals</b>                                                                                                                 |                |                          |                      |                             |
| <i>Rat</i>                                                                                                                     | a.s.           | Acute                    | LD <sub>50</sub>     | > 2000                      |
| <i>Rat</i>                                                                                                                     | Preparation    | Acute                    | LD <sub>50</sub>     | > 2000                      |
| <i>Rat</i>                                                                                                                     | a.s.           | Long-term<br>90 day oral | NOAEL                | 1000                        |
| Endocrine disrupting properties (Annex Part A, points 8.1.5)<br><i>None.</i>                                                   |                |                          |                      |                             |
| Additional higher tier studies (Annex Part A, points 10.1.1.2):<br><i>None.</i>                                                |                |                          |                      |                             |
| Terrestrial vertebrate wildlife (birds, mammals, reptile and amphibians) (Annex Part A, points 8.1.4, 10.1.3):<br><i>None.</i> |                |                          |                      |                             |

### Toxicity/exposure ratios for terrestrial vertebrates (Regulation (EU) N° 284/2013, Part A, Annex point 10.1)

**Lettuce, tomato, zucchini, pumpkin, eggplant, cucumber, strawberry, green bean at 135 g a.s./ha [x 7 applications]**

**Vineyard at 90 g a.s./ha [x 10 applications]**

**Kiwi (orchards) at 90 g a.s./ha [7 applications]**

| Growth stage                                                                             | Indicator or focal species | Time scale | DDD (mg/kg bw per day) | TER      | Trigger |
|------------------------------------------------------------------------------------------|----------------------------|------------|------------------------|----------|---------|
| <b>Screening Step (Birds)</b>                                                            |                            |            |                        |          |         |
| All vegetables                                                                           | Small omnivorous           | Acute      | 40.7322                | > 42     | 10      |
| All vegetables                                                                           | Small omnivorous           | Long-term  | 11.5911                | > 14.7   | 5       |
| All vineyard                                                                             | Small omnivorous           | Acute      | 13.7232                | > 124    | 10      |
| All vineyard                                                                             | Small omnivorous           | Long-term  | 3.71106                | >45.8    | 5       |
| All kiwi (orchard)                                                                       | Small insectivorous        | Acute      | 6.7392                 | > 252    | 10      |
| All kiwi (orchard)                                                                       | Small insectivorous        | Long-term  | 1.73628                | >97.9    | 5       |
| <b>Screening Step (Mammals)</b>                                                          |                            |            |                        |          |         |
| All orchards, vegetables, vines                                                          | Small herbivorous          | Acute      | 34.9866                | > 57.2   | 10      |
| All orchards, vegetables, vines                                                          | Small herbivorous          | Long-term  | 12.9327                | 77.5     | 5       |
| All strawberry                                                                           | Small herbivorous          | Acute      | 20.2464                | > 98.8   | 10      |
| All strawberry                                                                           | Small herbivorous          | Long-term  | 7.1421                 | 140      | 5       |
| <b>Risk from bioaccumulation and food chain behaviour (Not relevant – logKow = -1.6)</b> |                            |            |                        |          |         |
| <b>Risk from consumption of contaminated water</b>                                       |                            |            |                        |          |         |
| Scenarios                                                                                | Indicator or focal species | Time scale | PEC <sub>dw</sub> ×DWR | TER      | Trigger |
| Leaf scenario                                                                            | Birds                      | acute      | 0.017                  | > 100000 | 5       |
| <b>Puddle scenario, Screening step</b>                                                   |                            |            |                        |          |         |
| 1)Application rate (351 g a.s./ha)/1700 mg/kg bw <50, TER calculation not needed.        |                            |            |                        |          |         |
| 2)Application rate (351 g a.s./ha)/2000 mg/kg bw <3000, TER calculation not needed.      |                            |            |                        |          |         |

### Toxicity data for all aquatic tested species (Regulation (EU) N° 283/2013, Annex Part A, points 8.2 and Regulation (EU) N° 284/2013 Annex Part A, point 10.2)

\*This section does not yet reflect the new EFSA Guidance Document on aquatic organisms which has been noted in the meeting of the Standing Committee on Plants, Animals, Food and Feed on 11 July 2014.

| Group                   | Test substance | Time-scale (Test type)    | End point                   | Toxicity <sup>1</sup>          |
|-------------------------|----------------|---------------------------|-----------------------------|--------------------------------|
| <b>Laboratory tests</b> |                |                           |                             |                                |
| <b>Fish</b>             |                |                           |                             |                                |
| <i>O. mykiss</i>        | a.s.           | Acute 96 hr (semi-static) | Mortality, LC <sub>50</sub> | > 88 mg a.s./L <sub>(mm)</sub> |

|                                                                       |                |                                          |                                                                                                                     |                                                                                                             |
|-----------------------------------------------------------------------|----------------|------------------------------------------|---------------------------------------------------------------------------------------------------------------------|-------------------------------------------------------------------------------------------------------------|
| Group                                                                 | Test substance | Time-scale (Test type)                   | End point                                                                                                           | Toxicity <sup>1</sup>                                                                                       |
| <i>Danio rerio</i>                                                    | a.s.           | Acute 96 hr (semi-static)                | Mortality, LC <sub>50</sub>                                                                                         | <b>&gt; 71.3 mg a.s./L<sub>(mm)</sub></b>                                                                   |
| <i>Brachidanio rerio</i>                                              | Preparation*   | Acute 96 hr (static)                     | Mortality, LC <sub>50</sub>                                                                                         | > 103.9 mg prep./L (> 4.8 mg a.s./L <sub>(mm)</sub> )                                                       |
| Aquatic invertebrates                                                 |                |                                          |                                                                                                                     |                                                                                                             |
| <i>Daphnia magna</i>                                                  | a.s.           | 48 h (semi-static)                       | Mortality, EC <sub>50</sub>                                                                                         | > 100 mg a.s./L <sub>(nom)</sub>                                                                            |
| <i>Daphnia magna</i>                                                  | Preparation*   | 48 h (static)                            | Mortality, EC <sub>50</sub>                                                                                         | > 103 mg prep./L (> 4.89 mg a.s./L <sub>(mm)</sub> )                                                        |
| Sediment-dwelling organisms                                           |                |                                          |                                                                                                                     |                                                                                                             |
| No data presented or required.                                        |                |                                          |                                                                                                                     |                                                                                                             |
| Algae                                                                 |                |                                          |                                                                                                                     |                                                                                                             |
| <i>Desmodesmus subspicatus</i>                                        | Preparation*   | 72 h (static)                            | Growth rate: E <sub>r</sub> C <sub>50</sub> (NOEC)<br>Biomass: E <sub>b</sub> C <sub>50</sub> (NOEC)                | > 100 mg prep./L (> 4.8 mg a.s./L <sub>(mm)</sub> )<br>> 100 mg prep./L (> 4.8 mg a.s./L <sub>(mm)</sub> )  |
| Higher plant                                                          |                |                                          |                                                                                                                     |                                                                                                             |
| <i>Lemna gibba</i>                                                    | a.s.           | (static, or semi-static or flow-through) | Fronds number, EC <sub>50</sub> (NOEC)<br>Frond area/fresh weight/dry weight, E <sub>r</sub> C <sub>50</sub> (NOEC) | Only a preliminary (range-finding) test is available indicating a value of > 100 mg a.s./L <sub>(nom)</sub> |
| Potential endocrine disrupting properties (Annex Part A, point 8.2.3) |                |                                          |                                                                                                                     |                                                                                                             |
| <i>None.</i>                                                          |                |                                          |                                                                                                                     |                                                                                                             |

\* The stability of the test item in water was checked by appropriate analytical verification of the test solutions at test initiation and at test completion. This is not expected to have had an effect on the outcome of the test nor the endpoints derived.

<sup>1</sup> (nom) nominal concentration; (mm) mean measured concentration; prep.: preparation; a.s.: active substance

### Bioconcentration in fish (Annex Part A, point 8.2.2.3)

|                     | Active substance | Metabolite1 | Metabolite2 | Metabolite3 |
|---------------------|------------------|-------------|-------------|-------------|
| logP <sub>O/W</sub> | -1.6             |             |             |             |

**Toxicity/exposure ratios for the most sensitive aquatic organisms (Regulation (EU) N° 284/2013, Annex Part A, point 10.2)**
**FOCUS<sub>sw</sub> step 1-2 - TERs for laminarin – leafy and fruiting vegetables at 135 g a.s./ha x 7 applications**

| Scenario            | PEC global max<br>(µg L) | fish acute        | Aquatic invertebrates | Algae             | Higher plant       |
|---------------------|--------------------------|-------------------|-----------------------|-------------------|--------------------|
|                     |                          | <i>All tested</i> | <i>Daphnia magna</i>  | <i>All tested</i> | <i>Lemna gibba</i> |
|                     |                          | LC <sub>50</sub>  | EC <sub>50</sub>      | EC <sub>50</sub>  | EC <sub>50</sub>   |
|                     |                          | 71300 µg/L        | 100000 µg/L           | 4800 µg/L         | µg/L               |
| <b>FOCUS Step 1</b> | 354.3                    | > 201.32          | > 282.5               | > 13.6            | (Data gap)         |
| <b>FOCUS Step 2</b> |                          |                   |                       |                   |                    |
| North Europe        | 63.94                    | > 1116            | > 1564                | > 75.1            |                    |
| South Europe        | 51.52                    | > 1385            | > 1941                | > 93              |                    |
| Trigger             |                          | 100               | 100                   | 10                | 10                 |

### Effects on bees (Regulation (EU) N° 283/2013, Annex Part A, point 8.3.1 and Regulation (EU) N° 284/2013 Annex Part A, point 10.3.1)

\*This section does not reflect the new EFSA Guidance Document on bees which has not yet been noted by the Standing Committee on Plants, Animals, Food and Feed.

| Species               | Test substance | Time scale/type of endpoint | End point                            | toxicity        |
|-----------------------|----------------|-----------------------------|--------------------------------------|-----------------|
| <i>Apis mellifera</i> | a.s.           | Acute                       | Oral toxicity (LD <sub>50</sub> )    | > 118.64 µg/bee |
| <i>Apis mellifera</i> | a.s.           | Acute                       | Contact toxicity (LD <sub>50</sub> ) | > 100 µg/bee    |
| <i>Apis mellifera</i> | Preparation    | Acute                       | Oral toxicity (LD <sub>50</sub> )    | > 35.22 µg/bee  |
| <i>Apis mellifera</i> | Preparation    | Acute                       | Contact toxicity (LD <sub>50</sub> ) | > 103.5 µg/bee  |

#### Risk assessment for – lettuce at 135 g a.s./ha x 7 applications

| Species               | Test substance       | Risk quotient | HQ/ETR | Trigger |
|-----------------------|----------------------|---------------|--------|---------|
| <i>Apis mellifera</i> | a.s.,<br>preparation | HQcontact     | <3.83  | 50      |

### Effects on other arthropod species (Regulation (EU) N° 283/2013, Annex Part A, point 8.3.2 and Regulation (EU) N° 284/2013 Annex Part A, point 10.3.2)

#### Laboratory tests with standard sensitive species

| Species                       | Test Substance | End point                      | Toxicity   |
|-------------------------------|----------------|--------------------------------|------------|
| <i>Typhlodromus pyri</i>      | Preparation    | Mortality, LR <sub>50</sub>    | 114.7 g/ha |
|                               |                | Reproduction, ER <sub>50</sub> | > 370 g/ha |
| <i>Aphidius rhopalosiphii</i> | Preparation    | Mortality, LR <sub>50</sub>    | > 370 g/ha |
|                               |                | Reproduction, ER <sub>50</sub> | > 370 g/ha |

#### First tier risk assessment for – lettuce at 135 g a.s./ha x 7 applications

| Test substance | Species                       | Effect (LR <sub>50</sub> g/ha) | HQ in-field | HQ off-field <sup>1</sup> (1m) | Trigger |
|----------------|-------------------------------|--------------------------------|-------------|--------------------------------|---------|
| Phylig         | <i>Typhlodromus pyri</i>      | 114.7                          | <b>4.0</b>  | 0.07                           | 2       |
| Phylig         | <i>Aphidius rhopalosiphii</i> | > 370                          | < 1.24      | < 0.02                         | 2       |

<sup>1</sup>indicate distance assumed to calculate the drift rate

#### Extended laboratory tests, aged residue tests

| Species                  | Life stage | Test substance, substrate                                     | Time scale | Dose (g/ha) <sup>1,2</sup>                      | End point | % effect <sup>3</sup>                     | ER <sub>50</sub> |
|--------------------------|------------|---------------------------------------------------------------|------------|-------------------------------------------------|-----------|-------------------------------------------|------------------|
| <i>Typhlodromus pyri</i> | protonymph | Vacciplant (S1672aa / ARD 0707, content of active ingredient) | 14 day     | 18.5<br>46.3<br>115.7<br>289.3<br>723.2<br>1808 | Mortality | 11.7 ± 12.6<br>3.33 ± 2.89<br>6.67 ± 2.89 | > 1808 g a.s./ha |

| Species | Life stage | Test substance, substrate            | Time scale | Dose (g/ha) <sup>1,2</sup> | End point    | % effect <sup>3</sup>                         | ER <sub>50</sub> |
|---------|------------|--------------------------------------|------------|----------------------------|--------------|-----------------------------------------------|------------------|
|         |            | 45.2 g/L<br>(batch number: 15070885) |            |                            |              | 5.00 ± 5.00<br>11.7 ± 12.6<br>46.7 ± 12.6     |                  |
|         |            |                                      |            |                            | Reproduction | -25.3<br>6.60<br>2.98<br>30.6<br>29.1<br>97.3 | 792 g a.s./ha    |

<sup>1</sup> indicate whether initial or aged residues

<sup>2</sup> for preparations indicate whether dose is expressed in units of a.s. or preparation

<sup>3</sup> indicate if positive percentages relate to adverse effects or not

**Risk assessment** for – Lettuce, Tomato, Aubergine, Pepper, Greenbean, Cucumber, Zucchini at 135 g a.s./ha x 7 based on extended lab test or aged residue tests

| Species                  | ER <sub>50</sub> (g/ha) | In-field rate | Off-field rate <sup>1</sup> |
|--------------------------|-------------------------|---------------|-----------------------------|
| <i>Typhlodromus pyri</i> | 792                     | 459           | See above.                  |

<sup>1</sup> indicate distance assumed to calculate the drift rate and if 3D or 2D.

**Effects on non-target soil meso- and macro fauna; effects on soil nitrogen transformation (Regulation (EU) N° 283/2013, Annex Part A, points 8.4, 8.5, and Regulation (EU) N° 284/2013 Annex Part A, points 10.4, 10.5)**

| Test organism | Test substance | Application method of test a.s./ OM <sup>1</sup> | Time scale | End point                       | Toxicity                                                                                                                                                       |
|---------------|----------------|--------------------------------------------------|------------|---------------------------------|----------------------------------------------------------------------------------------------------------------------------------------------------------------|
| Earthworms    |                |                                                  |            |                                 |                                                                                                                                                                |
|               | a.s.           | Soil incorporation<br>10% OM                     | Chronic    | Growth, reproduction, behaviour | NOEC 262 mg a.s./kg d.w.soil<br>EC <sub>10</sub> , EC <sub>20</sub> could not be calculated as there were no significant effects up to the highest tested dose |

|                         |                     |  |  |                                                                                                                                    |
|-------------------------|---------------------|--|--|------------------------------------------------------------------------------------------------------------------------------------|
| Nitrogen transformation | a.s.<br>preparation |  |  | Laminarin is quickly degraded by soil micro-organisms which contain laminarase. No effect on microbial soil processes is expected. |
|-------------------------|---------------------|--|--|------------------------------------------------------------------------------------------------------------------------------------|

### Toxicity/exposure ratios for soil organisms

Lettuce at 135 g a.s./ha x 7 applications

| Test organism  | Test substance | Time scale | Soil PEC <sub>ini</sub> | TER | Trigger |
|----------------|----------------|------------|-------------------------|-----|---------|
| Earthworms     |                |            |                         |     |         |
| <i>Eisenia</i> | a.s.           | Chronic    | 0.700                   | 356 | 5       |

### Effects on terrestrial non target higher plants (Regulation (EU) N° 283/2013, Annex Part A, point 8.6 and Regulation (EU) N° 284/2013 Annex Part A, point 10.6)

#### Screening data

Screening data show that a deleterious effect on non-target plants is not expected up to a level > 1.5 L/ha (45 g laminarin/L formulation). Therefore no effect on non-target plants is expected from the proposed uses of 'Vacciplant Fruit et Legumes'.

### Effects on biological methods for sewage treatment (Regulation (EU) N° 283/2013, Annex Part A, point 8.8)

| Test type/organism | end point                                                                                           |
|--------------------|-----------------------------------------------------------------------------------------------------|
| Activated sludge   | Sludge microorganisms contain laminarase, therefore no effect on sludge microorganisms is expected. |

### Definition of the residue for monitoring (Regulation (EU) N° 283/2013, Annex Part A, point 7.4.2) Ecotoxicologically relevant compounds<sup>1</sup>

| Compartment |                                                             |
|-------------|-------------------------------------------------------------|
| soil        | Ecotoxicologically relevant laminarin, for monitoring none. |
| water       | Ecotoxicologically relevant laminarin, for monitoring none. |
| sediment    | Ecotoxicologically relevant laminarin, for monitoring none. |
| groundwater | laminarin                                                   |

<sup>1</sup> metabolites are considered relevant when, based on the risk assessment, they pose a risk comparable or higher than the parent

**Classification and labelling with regard to ecotoxicological data (Regulation (EU) N° 283/2013, Annex Part A, Section 10)**

|                                                                                                                                                                                                |                                       |
|------------------------------------------------------------------------------------------------------------------------------------------------------------------------------------------------|---------------------------------------|
| Substance                                                                                                                                                                                      | laminarin                             |
| Harmonised classification according to Regulation (EC) No 1272/2008 and its Adaptations to Technical Process [Table 3.1 of Annex VI of Regulation (EC) No 1272/2008 as amended] <sup>6</sup> : | No current harmonised classification. |
| Peer review proposal <sup>7</sup> for harmonised classification according to Regulation (EC) No 1272/2008:                                                                                     | None                                  |

<sup>6</sup> Regulation (EC) No 1272/2008 of the European Parliament and of the Council of 16 December 2008 on classification, labelling and packaging of substances and mixtures, amending and repealing Directives 67/548/EEC and 1999/45/EC, and amending Regulation (EC) No 1907/2006. OJ L 353, 31.12.2008, 1-1355.

<sup>7</sup> It should be noted that harmonised classification and labelling is formally proposed and decided in accordance with Regulation (EC) No 1272/2008.



## Abbreviations

|                   |                                                                   |
|-------------------|-------------------------------------------------------------------|
| 1/ <i>n</i>       | slope of Freundlich isotherm                                      |
| $\lambda$         | wavelength                                                        |
| $\epsilon$        | decadic molar extinction coefficient                              |
| a.s.              | active substance                                                  |
| AChE              | acetylcholinesterase                                              |
| ADE               | actual dermal exposure                                            |
| ADI               | acceptable daily intake                                           |
| AF                | assessment factor                                                 |
| AAOEL             | acute acceptable operator exposure level                          |
| AOEL              | acceptable operator exposure level                                |
| AP                | alkaline phosphatase                                              |
| AR                | applied radioactivity                                             |
| ARfD              | acute reference dose                                              |
| AST               | aspartate aminotransferase (SGOT)                                 |
| AUC               | area under the blood concentration/time curve                     |
| AV                | avoidance factor                                                  |
| BCF               | bioconcentration factor                                           |
| BUN               | blood urea nitrogen                                               |
| bw                | body weight                                                       |
| CAS               | Chemical Abstracts Service                                        |
| CFU               | colony-forming units                                              |
| ChE               | cholinesterase                                                    |
| CI                | confidence interval                                               |
| CIPAC             | Collaborative International Pesticides Analytical Council Limited |
| CL                | confidence limits                                                 |
| C <sub>max</sub>  | concentration achieved at peak blood level                        |
| DAA               | days after application                                            |
| DAT               | days after treatment                                              |
| DDD               | daily dietary dose                                                |
| DM                | dry matter                                                        |
| DT <sub>50</sub>  | period required for 50% dissipation (define method of estimation) |
| DT <sub>90</sub>  | period required for 90% dissipation (define method of estimation) |
| dw                | dry weight                                                        |
| EbC <sub>50</sub> | effective concentration (biomass)                                 |
| EC <sub>50</sub>  | effective concentration                                           |
| ECHA              | European Chemicals Agency                                         |
| EEC               | European Economic Community                                       |

|                       |                                                                                                                                                              |
|-----------------------|--------------------------------------------------------------------------------------------------------------------------------------------------------------|
| EMDI                  | estimated maximum daily intake                                                                                                                               |
| ER <sub>50</sub>      | emergence rate/effective rate, median                                                                                                                        |
| ErC <sub>50</sub>     | effective concentration (growth rate)                                                                                                                        |
| ETR                   | exposure toxicity ratio                                                                                                                                      |
| ETR <sub>acute</sub>  | exposure toxicity ratio for acute exposure                                                                                                                   |
| ETR <sub>larvae</sub> | exposure toxicity ratio for chronic exposure                                                                                                                 |
| ETR <sub>larvae</sub> | exposure toxicity ratio for larvae                                                                                                                           |
| ETR <sub>HPG</sub>    | exposure toxicity ratio for effects on honeybee hypopharygeal glands                                                                                         |
| EU                    | European Union                                                                                                                                               |
| EUROPOEM              | European Predictive Operator Exposure Model                                                                                                                  |
| f(twa)                | Time-weighted average factor                                                                                                                                 |
| FAO                   | Food and Agriculture Organization of the United Nations                                                                                                      |
| FID                   | flame ionisation detector                                                                                                                                    |
| FIR                   | food intake rate                                                                                                                                             |
| FOB                   | functional observation battery                                                                                                                               |
| FOCUS                 | Forum for the Co-ordination of Pesticide Fate Models and their Use                                                                                           |
| GAP                   | Good Agricultural Practice                                                                                                                                   |
| GC                    | gas chromatography                                                                                                                                           |
| GCPF                  | Global Crop Protection Federation (formerly known as International Group of National Associations of Manufacturers of Agrochemical Products; GIFAP)          |
| GGT                   | gamma glutamyl transferase                                                                                                                                   |
| GM                    | geometric mean                                                                                                                                               |
| GS                    | growth stage                                                                                                                                                 |
| GSH                   | glutathione                                                                                                                                                  |
| Hb                    | haemoglobin                                                                                                                                                  |
| Hct                   | haematocrit                                                                                                                                                  |
| HPLC                  | high-pressure liquid chromatography<br>or high-performance liquid chromatography                                                                             |
| HPLC-MS               | high-pressure liquid chromatography–mass spectrometry                                                                                                        |
| HPG                   | hypopharygeal glands                                                                                                                                         |
| HQ                    | hazard quotient                                                                                                                                              |
| HQ <sub>contact</sub> | hazard quotient for contact exposure                                                                                                                         |
| HR                    | hazard rate                                                                                                                                                  |
| IEDI                  | international estimated daily intake                                                                                                                         |
| IESTI                 | international estimated short-term intake                                                                                                                    |
| ISO                   | International Organization for Standardization                                                                                                               |
| IUPAC                 | International Union of Pure and Applied Chemistry                                                                                                            |
| iv                    | intravenous                                                                                                                                                  |
| JMPR                  | Joint Meeting of the FAO Panel of Experts on Pesticide Residues in Food and the Environment and the WHO Expert Group on Pesticide Residues (Joint Meeting on |

|             |                                                         |
|-------------|---------------------------------------------------------|
|             | Pesticide Residues)                                     |
| $K_{doc}$   | organic carbon linear adsorption coefficient            |
| $K_{Foc}$   | Freundlich organic carbon adsorption coefficient        |
| LC          | liquid chromatography                                   |
| $LC_{50}$   | lethal concentration, median                            |
| LC-MS       | liquid chromatography–mass spectrometry                 |
| LC-MS-MS    | liquid chromatography with tandem mass spectrometry     |
| $LD_{50}$   | lethal dose, median; dosis letalis media                |
| $LDD_{50}$  | lethal dietary dose; median                             |
| LDH         | lactate dehydrogenase                                   |
| LOAEL       | lowest observable adverse effect level                  |
| LOD         | limit of detection                                      |
| LOQ         | limit of quantification                                 |
| M/L         | mixing and loading                                      |
| MAF         | multiple application factor                             |
| MCH         | mean corpuscular haemoglobin                            |
| MCHC        | mean corpuscular haemoglobin concentration              |
| MCV         | mean corpuscular volume                                 |
| mm          | millimetre (also used for mean measured concentrations) |
| mN          | milli-newton                                            |
| MRL         | maximum residue level                                   |
| MS          | mass spectrometry                                       |
| MSDS        | material safety data sheet                              |
| MTD         | maximum tolerated dose                                  |
| MWHC        | maximum water-holding capacity                          |
| NESTI       | national estimated short-term intake                    |
| NOAEC       | no observed adverse effect concentration                |
| NOAEL       | no observed adverse effect level                        |
| NOEC        | no observed effect concentration                        |
| NOEL        | no observed effect level                                |
| NPD         | nitrogen–phosphorus detector                            |
| OECD        | Organisation for Economic Co-operation and Development  |
| OM          | organic matter content                                  |
| Pa          | pascal                                                  |
| PD          | proportion of different food types                      |
| PEC         | predicted environmental concentration                   |
| $PEC_{air}$ | predicted environmental concentration in air            |
| $PEC_{gw}$  | predicted environmental concentration in groundwater    |

|                     |                                                                  |
|---------------------|------------------------------------------------------------------|
| PEC <sub>sed</sub>  | predicted environmental concentration in sediment                |
| PEC <sub>soil</sub> | predicted environmental concentration in soil                    |
| PEC <sub>sw</sub>   | predicted environmental concentration in surface water           |
| PHED                | pesticide handler's exposure data                                |
| PHI                 | pre-harvest interval                                             |
| PIE                 | potential inhalation exposure                                    |
| pK <sub>a</sub>     | negative logarithm (to the base 10) of the dissociation constant |
| P <sub>ow</sub>     | partition coefficient between <i>n</i> -octanol and water        |
| PPE                 | personal protective equipment                                    |
| ppm                 | parts per million (10 <sup>-6</sup> )                            |
| PT                  | proportion of diet obtained in the treated area                  |
| PTT                 | partial thromboplastin time                                      |
| QSAR                | quantitative structure–activity relationship                     |
| r <sup>2</sup>      | coefficient of determination                                     |
| RPE                 | respiratory protective equipment                                 |
| RUD                 | residue per unit dose                                            |
| SC                  | suspension concentrate                                           |
| SD                  | standard deviation                                               |
| SFO                 | single first-order                                               |
| SMILES              | simplified molecular-input line-entry system                     |
| SPG                 | specific protection goal                                         |
| SSD                 | species sensitivity distribution                                 |
| STMR                | supervised trials median residue                                 |
| t <sub>1/2</sub>    | half-life (define method of estimation)                          |
| TER                 | toxicity exposure ratio                                          |
| TER <sub>A</sub>    | toxicity exposure ratio for acute exposure                       |
| TER <sub>LT</sub>   | toxicity exposure ratio following chronic exposure               |
| TER <sub>ST</sub>   | toxicity exposure ratio following repeated exposure              |
| TK                  | technical concentrate                                            |
| TLV                 | threshold limit value                                            |
| Tmax                | time until peak blood levels achieved                            |
| TMDI                | theoretical maximum daily intake                                 |
| TRR                 | total radioactive residue                                        |
| TSH                 | thyroid-stimulating hormone (thyrotropin)                        |
| TWA                 | time-weighted average                                            |
| UDS                 | unscheduled DNA synthesis                                        |
| UF                  | uncertainty factor                                               |
| UV                  | ultraviolet                                                      |

|     |                           |
|-----|---------------------------|
| W/S | water/sediment            |
| w/v | weight per unit volume    |
| w/w | weight per unit weight    |
| WBC | white blood cell          |
| WG  | water-dispersible granule |
| WHO | World Health Organization |
